# Supplementary material for: Neuronal DAF-16-to-intestinal DAF-16 communication underlies organismal lifespan extension in C. elegans
Source: PubMed Central journal article supplement (PMC8246587; doi:10.1016/j.isci.2021.102706), 2021-06-10
Supplement: mmc1.pdf [file mmc1.pdf]

iScience, Volume 24

## Supplemental information

**Neuronal DAF-16-to-intestinal DAF-16 communication  
underlies organismal lifespan  
extension in *C. elegans***

**Masaharu Uno, Yuri Tani, Masanori Nono, Emiko Okabe, Saya Kishimoto, Chika  
Takahashi, Ryoji Abe, Takuya Kurihara, and Eisuke Nishida**

## **Supplemental Information**

### **Neural DAF-16-to-Intestinal DAF-16 Communication Underlies Organismal Lifespan Extension in *C. elegans***

Masaharu Uno, Yuri Tani, Masanori Nono, Emiko Okabe, Saya Kishimoto, Chika Takahashi, Ryoji Abe, Takuya Kurihara, & Eisuke Nishida

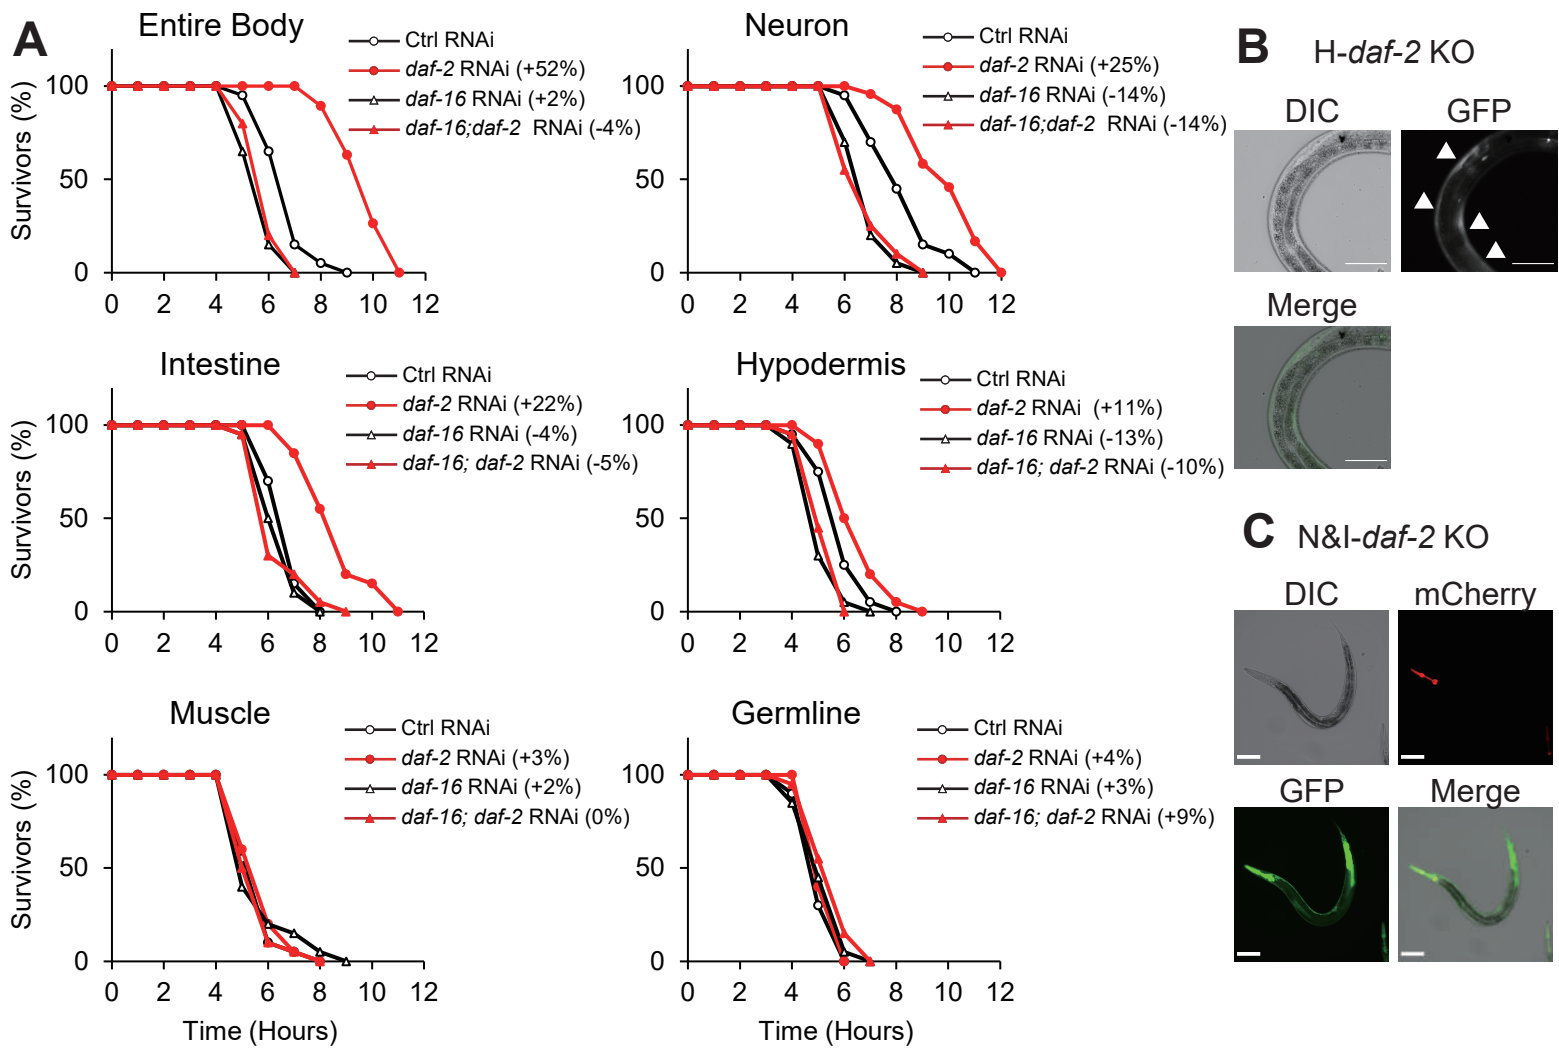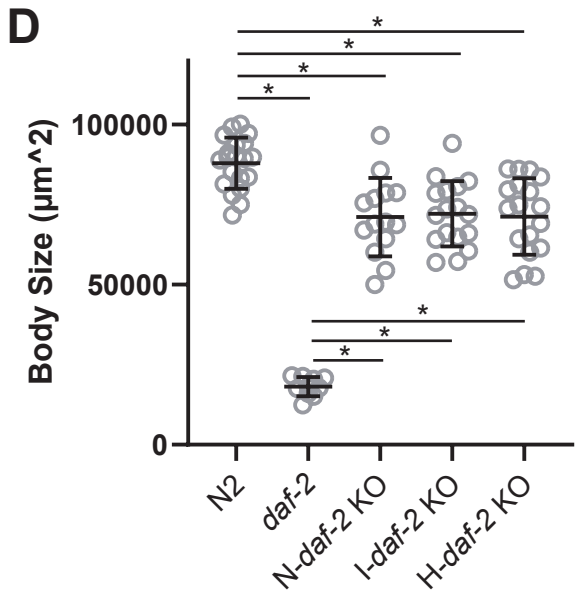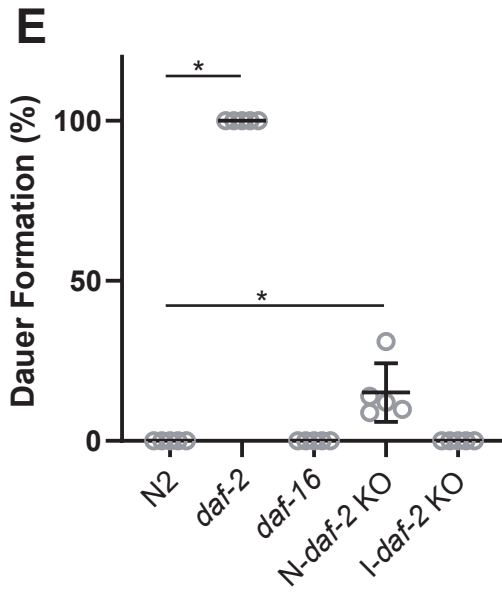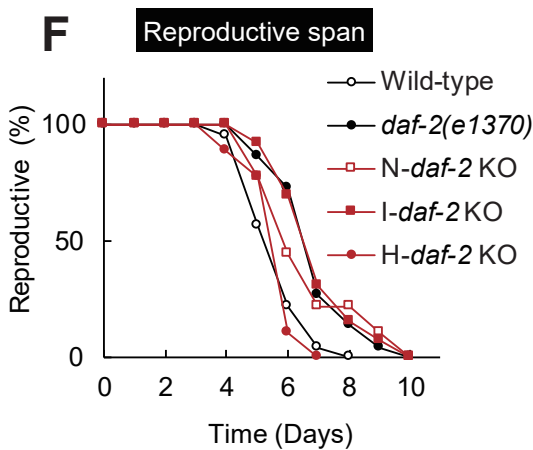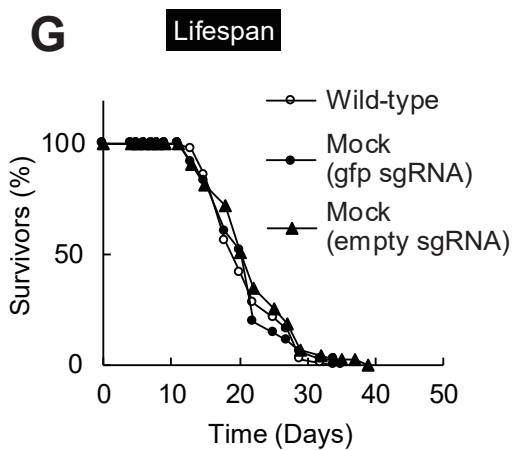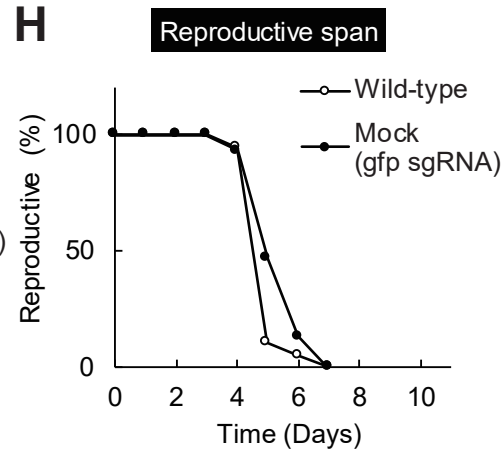

**Figure S1**

**Figure S1 *daf-2* Knockdown in the Neuron, Intestine, and Hypodermis Increases Oxidative Stress Resistance in a Cell Autonomous DAF-16-Dependent Manner. Related to Figure 1.**

**(A)** Oxidative stress resistance in worms treated with *daf-2* and/or *daf-16* RNAi in the entire body (wild type N2, upper left), neuron (TU3401, upper middle), intestine (VP303, upper right), hypodermis (NR222, lower left), muscle (NR350, lower middle), or germline cells (NL2098, lower right). Representative data from two or three independent experiments are shown.

**(B, C)** Representative expression patterns of wGFP reconstituted from wGxxFP as observed in hypodermis *daf-2* knockout (H-*daf-2* KO, arrow heads indicate hypodermis) (B) or neuron and intestinal *daf-2* knockout (N&I-*daf-2* KO) (C) transgenic worms. Scale bar indicates 50 or 100  $\mu\text{m}$  in B or C, respectively.

**(D)** Scatter plots of the body sizes of worms (N2, *daf-2(e1370)*, and neuron-, intestine-, and hypodermis-*daf-2* KO). Representative data from three independent experiments are shown. Statistical significance was calculated by one-way ANOVA with a post hoc Tukey's test. \* $P < 0.05$ . Error bars represent the mean  $\pm$  s.d. Data represent size of individual animals in a representative experiment.

**(E)** Scatter plots of the dauer formation ratio from five independent experiments are shown. Error bars represent the mean  $\pm$  s.d. of five independent experiments. Statistical significance was calculated by one-way ANOVA with a post hoc Dunn's test. \* $P < 0.05$ .

**(F)** Reproductive spans of worms with the knockout *daf-2* in the neuron (N-*daf-2*), intestine (I-*daf-2*), or hypodermis (H-*daf-2*). Representative data from three independent experiments are shown.

**(G)** Survival curves of worms expressing CRISPR/Cas9 and *gfp* sgRNA or empty sgRNA. Representative data from three independent experiments are shown.

**(H)** Reproductive spans of worms expressing CRISPR/Cas9 and *gfp* sgRNA. Representative

data from two independent experiments are shown.

Statistics are presented in Tables S3, 6, and 7.

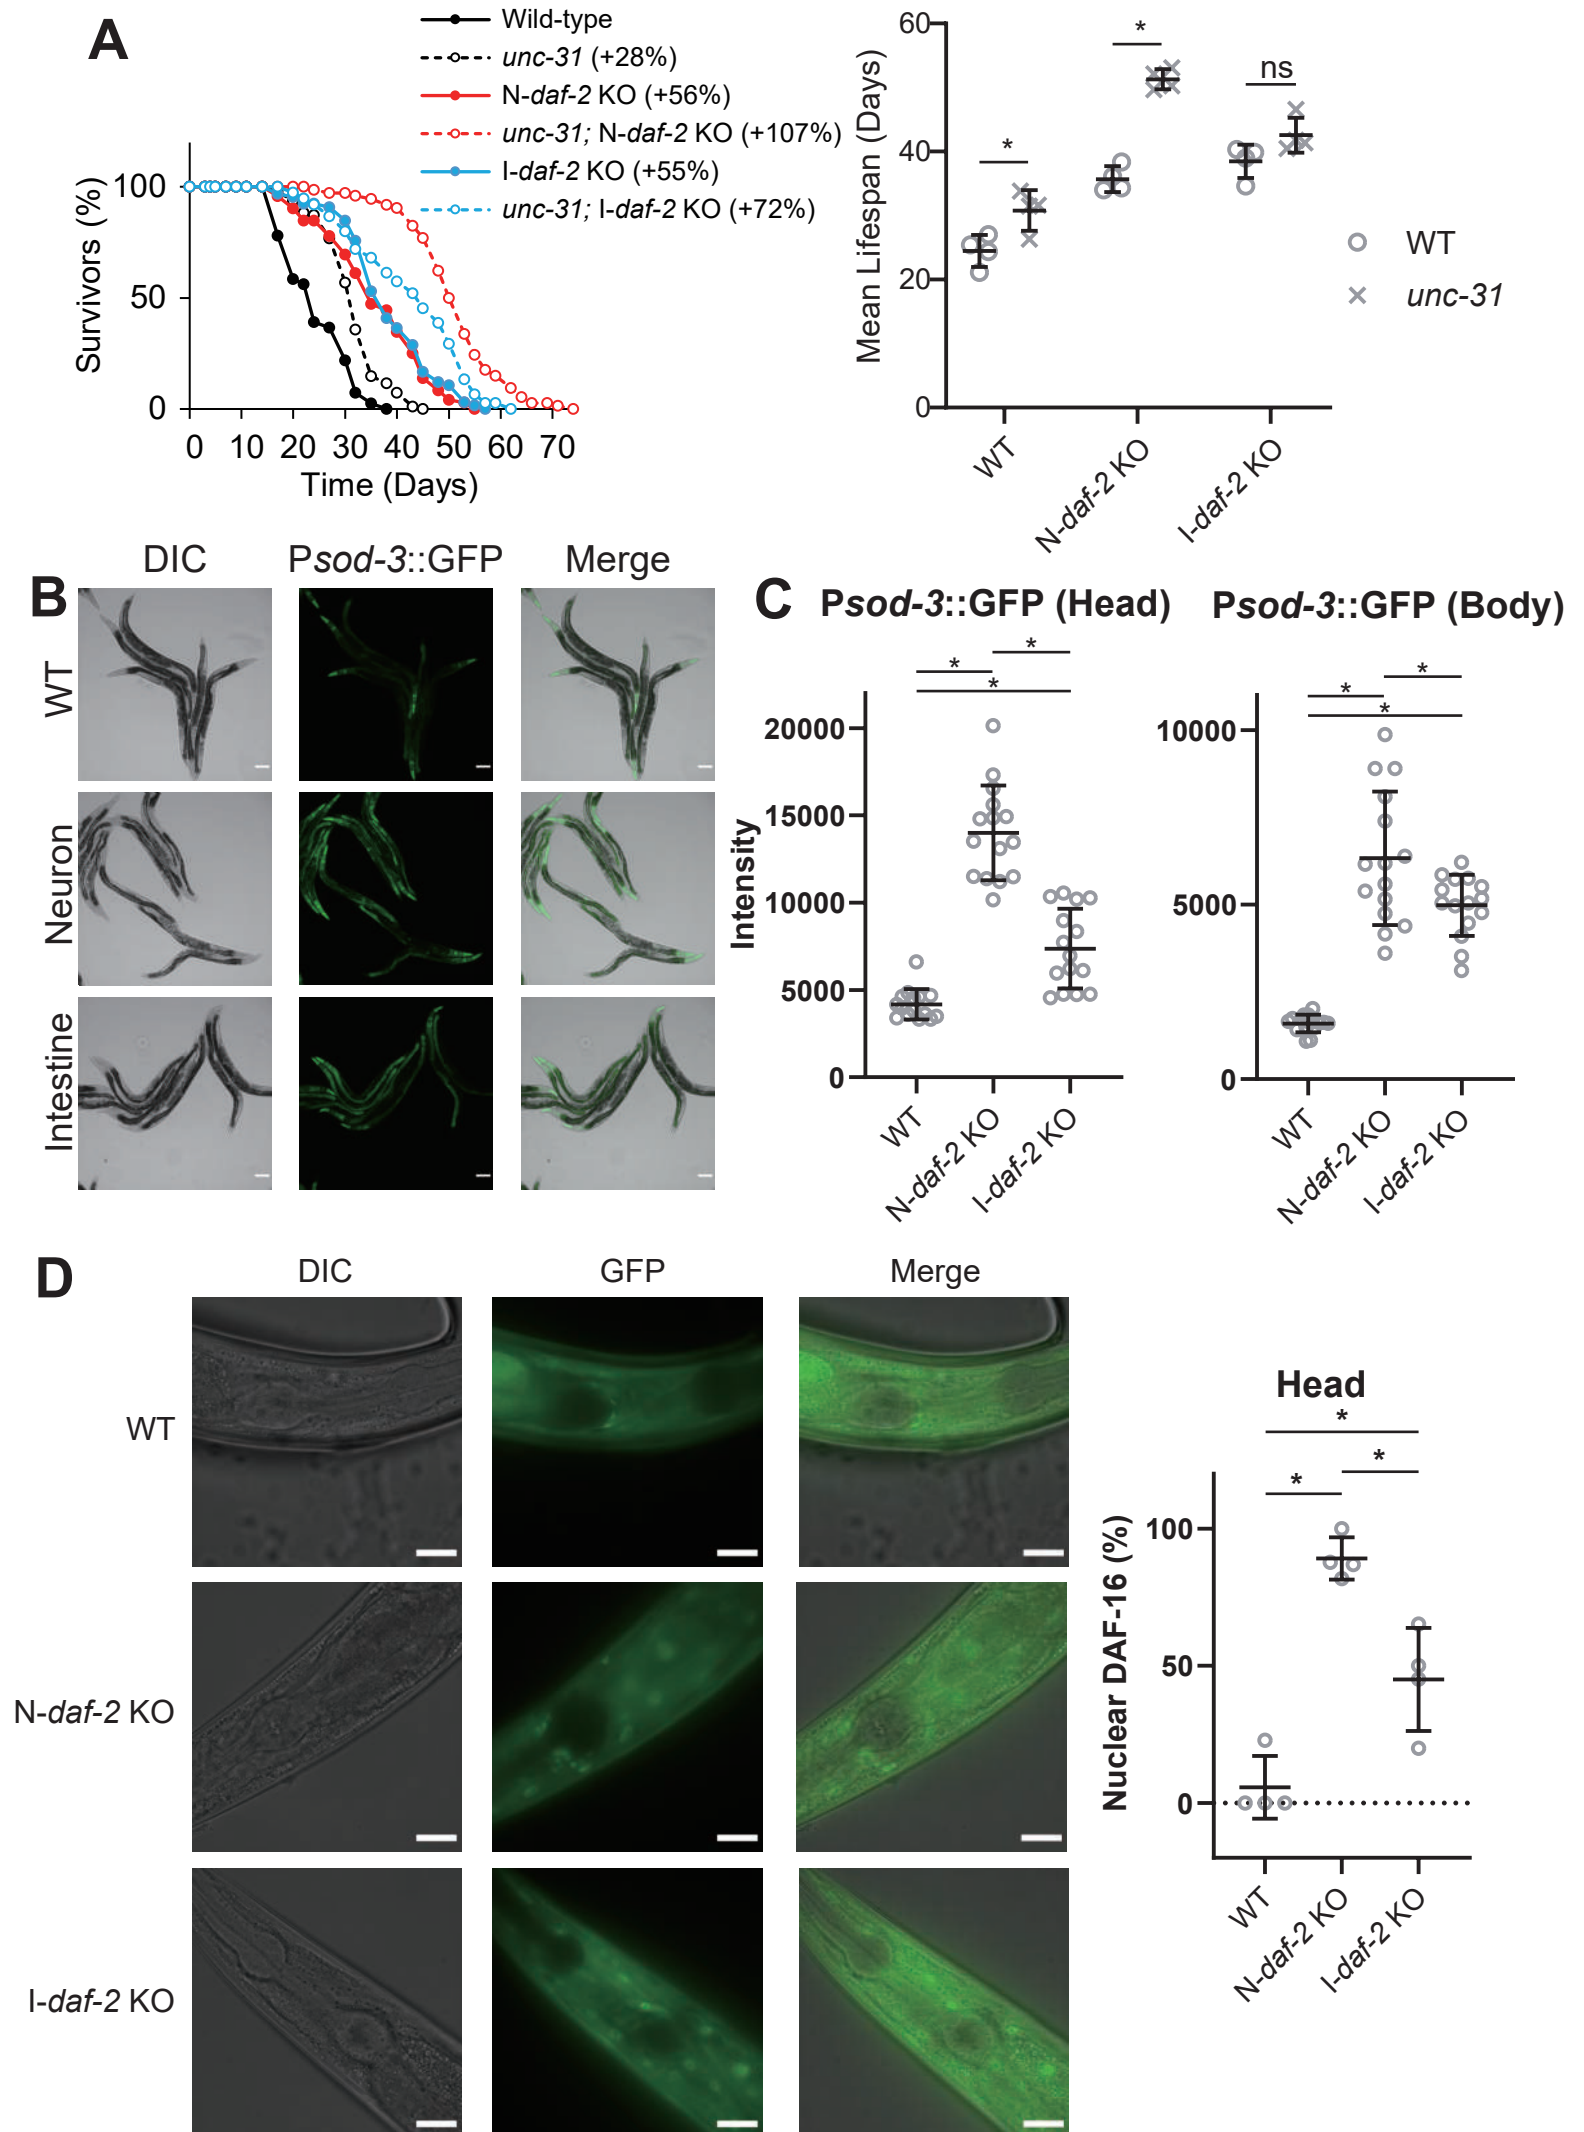

Figure S2

**Figure S2 *daf-2* Knockout in the Neuron Extends Lifespan in a UNC-31-Independent Manner. Related to Figure 2.**

**(A)** Survival curves of *unc-31(e298)* worms with the knockout of *daf-2* in the neuron or intestine (left). Mean lifespan from four technical experiments of the representative data are shown (right). To examine the functional interaction between neuron-*daf-2* KO and *unc-31* mutation, we conducted two-way ANOVA analysis with post hoc Sidak's test. (right). Statistical significance was calculated by two-way ANOVA with a post hoc Sidak's test. \* $P < 0.05$ . Representative data from two independent experiments are shown.

**(B)** Representative images showing the expression patterns of GFP driven by the promoter of *sod-3* in wildtype (upper) and transgenic worms with knockout of the *daf-2* gene in the intestine (N-*daf-2* KO, middle) or neuron (I-*daf-2* KO, lower).

**(C)** Quantification of GFP fluorescence intensity of head (left) or body (right) region of animals. Representative data from two independent experiments are shown. Data represent mean  $\pm$  s.d. from 15 individual animals. Statistical significance was calculated by one-way ANOVA with a post hoc Tukey's test. \* $P < 0.05$ .

**(D)** Localization pattern of DAF-16::GFP in the head region of wildtype (left-upper) and that of transgenic worms with knockout of the *daf-2* gene in the neuron (N-*daf-2* KO, left-middle) or intestine (I-*daf-2* KO, left-lower). Scale bar indicates 20  $\mu\text{m}$ . Ratio of the animals with DAF-16::GFP nuclear accumulation in the head neuron (right). Value represents mean  $\pm$  s.d. from 4 independent experiments. Statistical significance was calculated by one-way ANOVA with a post hoc Tukey's test. \* $P < 0.05$ .

Statistics are presented in Table S5.

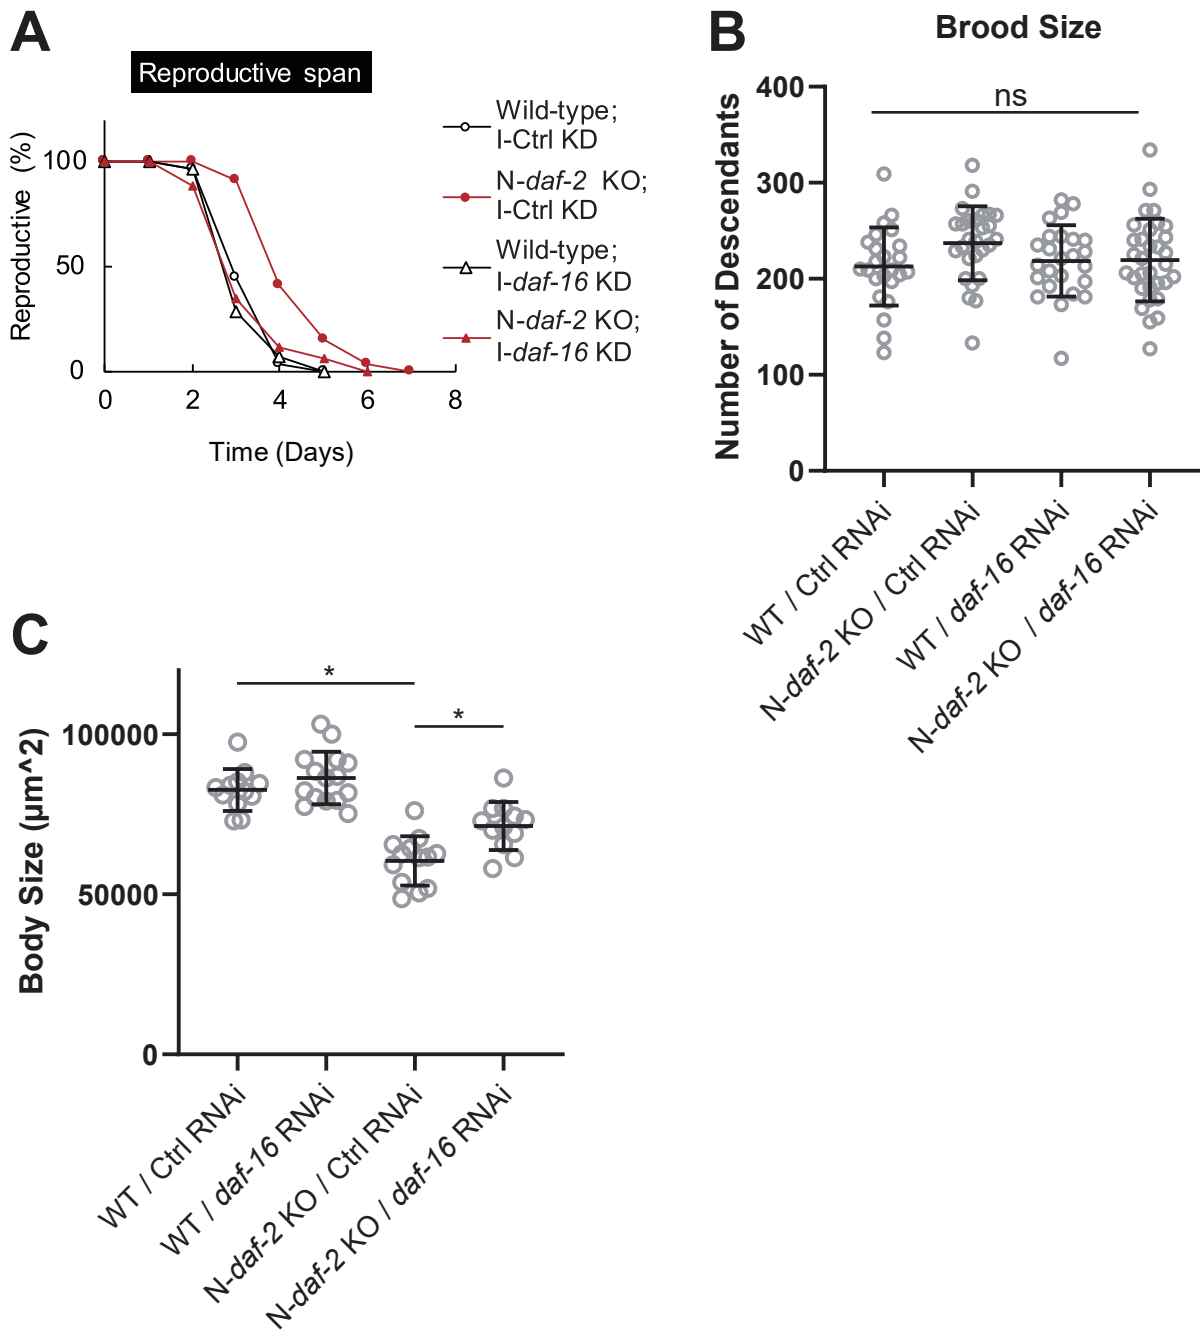

Figure S3



**Figure S3 *daf-2* knockout in the Neuron Slows Development in an Intestinal DAF-16-Dependent Manner. Related to Figure 3.**

**(A)** Reproductive spans of worms with deficiency in *daf-2* in the neuron and /or *daf-16* in the intestine. Representative data from two independent experiments are shown. Data represent mean  $\pm$  s.d. from 4 technical replicates. Statistical significance was calculated by two-way ANOVA with a post hoc Sidak's test. \* $P < 0.05$ .

**(B)** Scatter plots of the brood size of individual worm with deficiency of *daf-2* in the neuron and/or *daf-16* in the intestine. Statistical significance was calculated by one-way ANOVA with a post hoc Tukey's test. \* $P < 0.05$ .

**(C)** Scatter plots of the body sizes of worms with deficiency of *daf-2* in the neuron and/or *daf-16* in the intestine. Representative data from three independent experiments are shown. Statistical significance was calculated by one-way ANOVA with a post hoc Tukey's test. \* $P < 0.05$ .

Statistics are presented in Table S11 and S12.

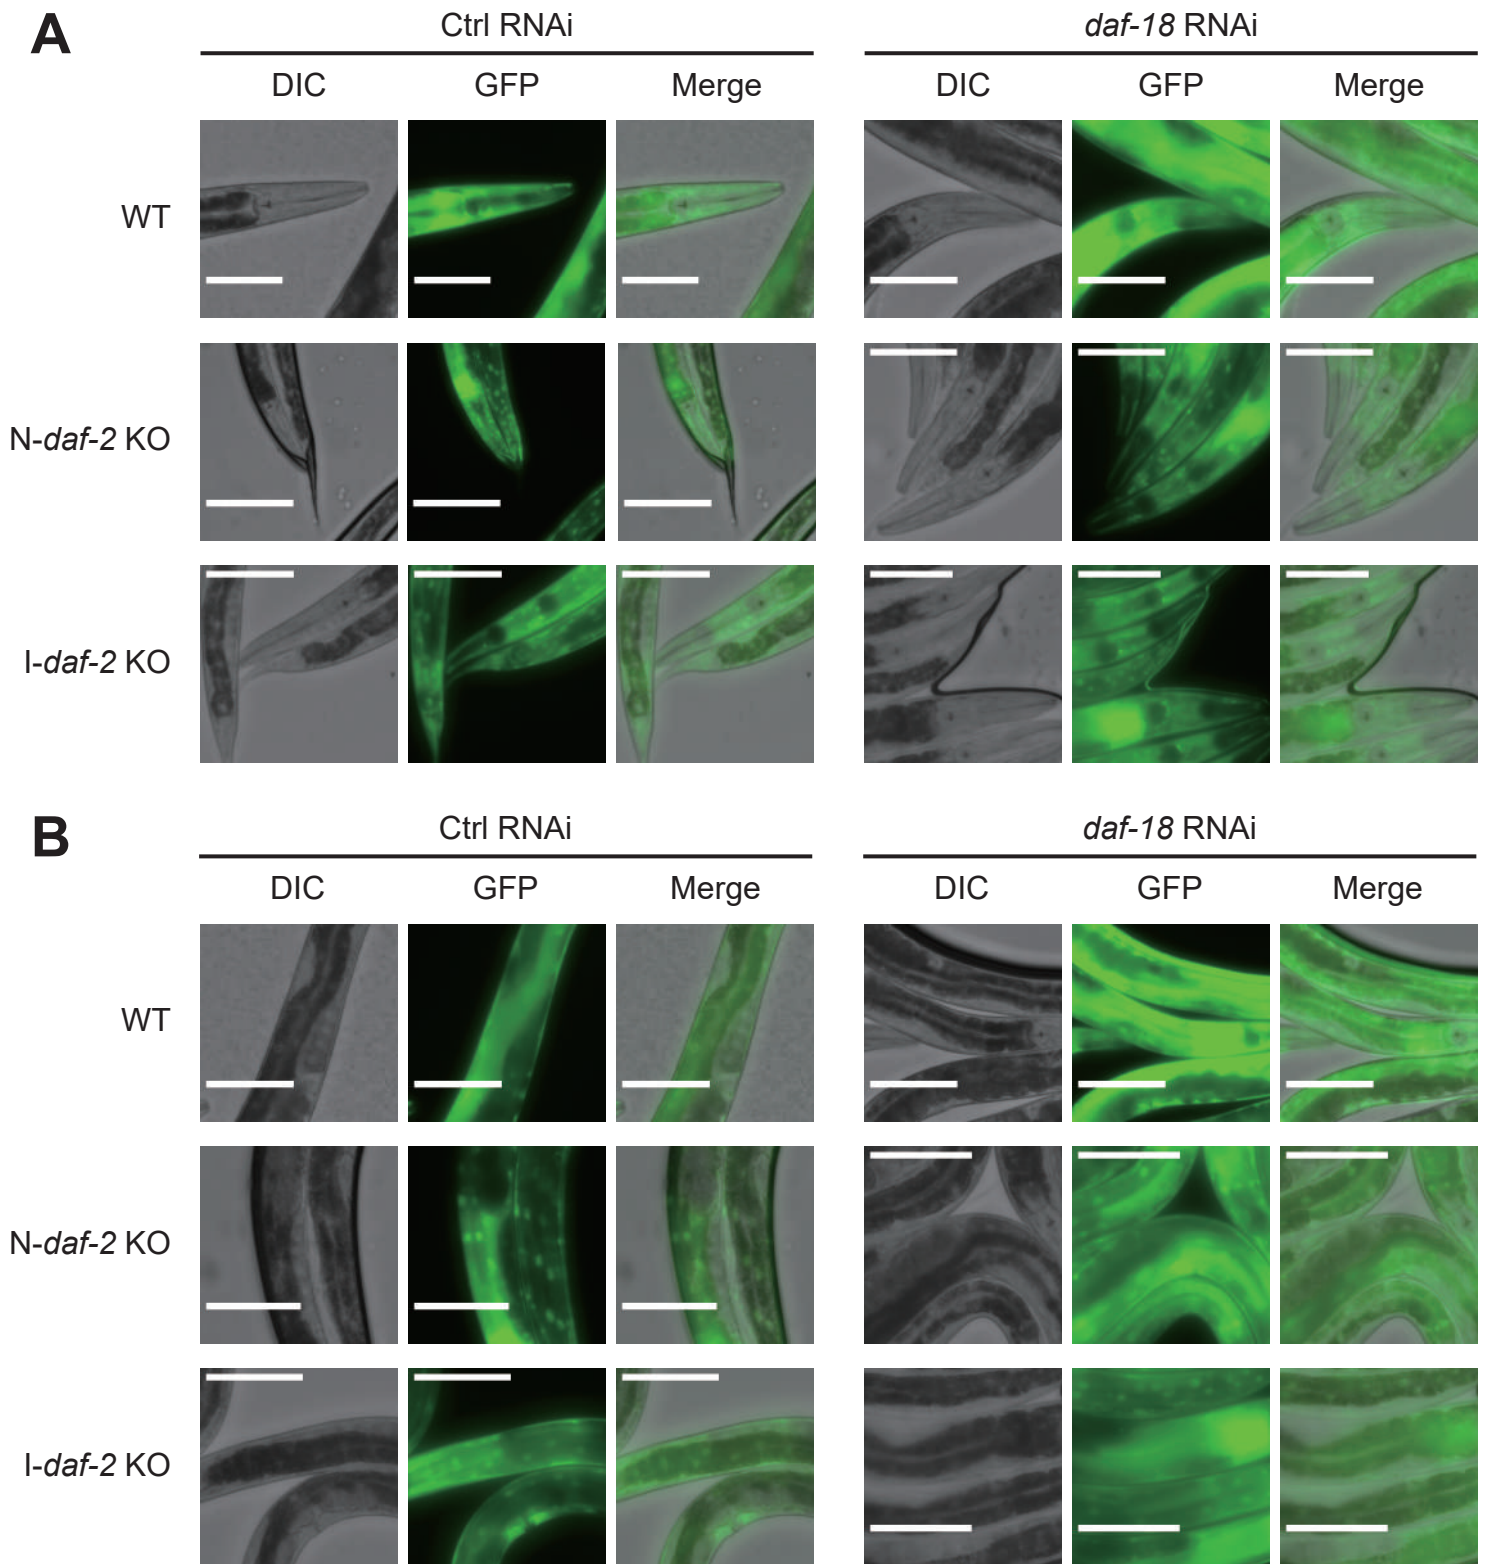

**Figure S4**

**Figure S4 DAF-16 Nuclear Accumulation in the Intestine Is Retarded by *daf-18* RNAi.  
Related to Figure 5.**

**(A)** Expression patterns of DAF-16::GFP in the head region of wildtype (left-upper) and that of transgenic worms with knockout of the *daf-2* gene in the neuron (N-*daf-2* KO, left-middle) or intestine (I-*daf-2* KO, left-lower). Each strain was treated with control (left) or *daf-18* (right) RNAi. Scale bar indicates 100  $\mu$ m.

**(B)** Expression patterns of DAF-16::GFP in the body region of wildtype (left-upper) and that of transgenic worms with knockout of the *daf-2* gene in the intestine (N-*daf-2* KO, left-middle) or neuron (I-*daf-2* KO, left-lower). Each strain was treated with control (left) or *daf-18* (right) RNAi. Scale bar indicates 100  $\mu$ m.

Statistics are presented in Table S13.

**Table S1. Statistics of the Independent Lifespan Experiments 1. Related to Figure 1**

| Trial     | Strain Trial | RNAi                     | Average life (Days) | Std. error | Worms (n) | Bonferoni P-value    |                       |                                     |
|-----------|--------------|--------------------------|---------------------|------------|-----------|----------------------|-----------------------|-------------------------------------|
|           |              |                          |                     |            |           | Ctrl vs <i>daf-2</i> | Ctrl vs <i>daf-16</i> | <i>daf-2</i> vs <i>daf-2;daf-16</i> |
| #1        | N2           | Ctrl RNAi                | 19.79               | 0.59       | 26/40     |                      |                       |                                     |
|           |              | <i>daf-2</i> RNAi        | 38.5                | 0.82       | 58/72     | <0.0001              | 0.0053                | <0.0001                             |
|           |              | <i>daf-16</i> RNAi       | 17.36               | 0.41       | 46/80     |                      |                       |                                     |
|           |              | <i>daf-16;daf-2</i> RNAi | 18.61               | 0.64       | 39/80     |                      |                       |                                     |
| Ctrl RNAi | 19.91        | 0.35                     | 75/80               |            |           |                      |                       |                                     |
| #2        | N2           | <i>daf-2</i> RNAi        | 36.47               | 0.72       | 49/60     | <0.0001              | <0.0001               | <0.0001                             |
|           |              | <i>daf-16</i> RNAi       | 16.47               | 0.38       | 65/80     |                      |                       |                                     |
|           |              | <i>daf-16;daf-2</i> RNAi | 17.73               | 0.47       | 77/80     |                      |                       |                                     |
|           |              | Ctrl RNAi                | 26.52               | 0.48       | 69/80     |                      |                       |                                     |
| #3        | N2           | <i>daf-2</i> RNAi        | 39.41               | 0.49       | 56/80     | <0.0001              | 0.0001                | <0.0001                             |
|           |              | <i>daf-16</i> RNAi       | 24.02               | 0.47       | 71/80     |                      |                       |                                     |
|           |              | <i>daf-16;daf-2</i> RNAi | 23.54               | 0.51       | 70/80     |                      |                       |                                     |
|           |              | Ctrl RNAi                | 20.19               | 0.58       | 58/60     |                      |                       |                                     |
| #1        | TU3401       | <i>daf-2</i> RNAi        | 32.49               | 0.6        | 55/80     | <0.0001              | 0.0013                | <0.0001                             |
|           |              | <i>daf-16</i> RNAi       | 17.56               | 0.53       | 48/60     |                      |                       |                                     |
|           |              | <i>daf-16;daf-2</i> RNAi | 18.41               | 0.61       | 29/40     |                      |                       |                                     |
|           |              | Ctrl RNAi                | 21.24               | 0.41       | 59/60     |                      |                       |                                     |
| #2        | TU3401       | <i>daf-2</i> RNAi        | 34.08               | 0.68       | 40/40     | <0.0001              | <0.0001               | <0.0001                             |
|           |              | <i>daf-16</i> RNAi       | 18.46               | 0.37       | 37/40     |                      |                       |                                     |
|           |              | <i>daf-16;daf-2</i> RNAi | 18.22               | 0.48       | 56/60     |                      |                       |                                     |
|           |              | Ctrl RNAi                | 27.86               | 0.58       | 53/60     |                      |                       |                                     |
| #3        | TU3401       | <i>daf-2</i> RNAi        | 36.37               | 0.44       | 54/60     | <0.0001              | <0.0001               | <0.0001                             |
|           |              | <i>daf-16</i> RNAi       | 23.79               | 0.58       | 55/60     |                      |                       |                                     |
|           |              | <i>daf-16;daf-2</i> RNAi | 24.46               | 0.55       | 49/60     |                      |                       |                                     |
|           |              | Ctrl RNAi                | 20.95               | 1          | 19/40     |                      |                       |                                     |
| #1        | VP303        | <i>daf-2</i> RNAi        | 29.21               | 0.9        | 61/80     | <0.0001              | 0.0183                | <0.0001                             |
|           |              | <i>daf-16</i> RNAi       | 17.95               | 0.54       | 31/80     |                      |                       |                                     |
|           |              | <i>daf-16;daf-2</i> RNAi | 20.14               | 0.59       | 32/80     |                      |                       |                                     |
|           |              | Ctrl RNAi                | 22.57               | 0.52       | 35/40     |                      |                       |                                     |
| #2        | VP303        | <i>daf-2</i> RNAi        | 32.22               | 1.09       | 18/40     | <0.0001              | <0.0001               | <0.0001                             |
|           |              | <i>daf-16</i> RNAi       | 19.59               | 0.34       | 54/60     |                      |                       |                                     |
|           |              | <i>daf-16;daf-2</i> RNAi | 20.33               | 0.54       | 55/60     |                      |                       |                                     |
|           |              | Ctrl RNAi                | 26.53               | 0.57       | 47/60     |                      |                       |                                     |
| #3        | VP303        | <i>daf-2</i> RNAi        | 31.66               | 0.65       | 41/60     | <0.0001              | 0.0025                | <0.0001                             |
|           |              | <i>daf-16</i> RNAi       | 24.55               | 0.52       | 31/40     |                      |                       |                                     |
|           |              | <i>daf-16;daf-2</i> RNAi | 24.46               | 0.48       | 45/60     |                      |                       |                                     |
|           |              | Ctrl RNAi                | 19.44               | 0.42       | 68/80     |                      |                       |                                     |
| #1        | NR222        | <i>daf-2</i> RNAi        | 23.17               | 0.74       | 37/40     | <0.0001              | 0.0566                | <0.0001                             |
|           |              | <i>daf-16</i> RNAi       | 17.85               | 0.45       | 58/80     |                      |                       |                                     |
|           |              | <i>daf-16;daf-2</i> RNAi | 18.46               | 0.45       | 68/80     |                      |                       |                                     |
|           |              | Ctrl RNAi                | 19.89               | 0.57       | 39/60     |                      |                       |                                     |
| #2        | NR222        | <i>daf-2</i> RNAi        | 24.74               | 0.57       | 57/60     | <0.0001              | 0.0122                | <0.0001                             |
|           |              | <i>daf-16</i> RNAi       | 17.33               | 0.55       | 51/60     |                      |                       |                                     |
|           |              | <i>daf-16;daf-2</i> RNAi | 17.79               | 0.67       | 53/60     |                      |                       |                                     |
|           |              | Ctrl RNAi                | 25.9                | 0.84       | 38/60     |                      |                       |                                     |
| #3        | NR222        | <i>daf-2</i> RNAi        | 29.8                | 0.66       | 50/60     | 0.0012               | 0.0065                | <0.0001                             |
|           |              | <i>daf-16</i> RNAi       | 22.9                | 0.73       | 45/60     |                      |                       |                                     |
|           |              | <i>daf-16;daf-2</i> RNAi | 23.15               | 0.83       | 47/60     |                      |                       |                                     |
|           |              | Ctrl RNAi                | 15.62               | 0.2        | 76/80     |                      |                       |                                     |
| #1        | DCL569       | <i>daf-2</i> RNAi        | 18.5                | 0.36       | 72/81     | <0.0001              | 1                     | <0.0001                             |
|           |              | <i>daf-16</i> RNAi       | 15.31               | 0.24       | 73/80     |                      |                       |                                     |
|           |              | <i>daf-16;daf-2</i> RNAi | 15.63               | 0.22       | 78/80     |                      |                       |                                     |
|           |              | Ctrl RNAi                | 15.96               | 0.2        | 63/78     |                      |                       |                                     |
| #2        | DCL569       | <i>daf-2</i> RNAi        | 18.68               | 0.38       | 72/80     | <0.0001              | <0.0001               | <0.0001                             |
|           |              | <i>daf-16</i> RNAi       | 14.32               | 0.22       | 69/80     |                      |                       |                                     |
|           |              | <i>daf-16;daf-2</i> RNAi | 15.53               | 0.25       | 78/80     |                      |                       |                                     |
|           |              | Ctrl RNAi                | 17.56               | 0.55       | 27/40     |                      |                       |                                     |
| #1        | NR350        | <i>daf-2</i> RNAi        | 17.41               | 0.57       | 25/40     | 1                    | 1                     | 1                                   |
|           |              | <i>daf-16</i> RNAi       | 17.23               | 0.35       | 45/80     |                      |                       |                                     |
|           |              | <i>daf-16;daf-2</i> RNAi | 17                  | 0.48       | 32/40     |                      |                       |                                     |
|           |              | Ctrl RNAi                | 17.62               | 0.35       | 52/60     |                      |                       |                                     |
| #2        | NR350        | <i>daf-2</i> RNAi        | 18.85               | 0.56       | 26/31     | 0.2851               | 1                     | 0.0039                              |
|           |              | <i>daf-16</i> RNAi       | 17.29               | 0.83       | 14/20     |                      |                       |                                     |
|           |              | <i>daf-16;daf-2</i> RNAi | 16.58               | 0.35       | 40/60     |                      |                       |                                     |
|           |              | Ctrl RNAi                | 17.62               | 0.35       | 52/60     |                      |                       |                                     |

**Table S2. Statistics of the Independent Oxidative Stress Experiments 1. Related to Figure S1**

| Trial | Strain Trial | RNAi                     | Average life (Hours) | Std. error | Worms (n) | Bonferoni P-value    |                       |                                     |
|-------|--------------|--------------------------|----------------------|------------|-----------|----------------------|-----------------------|-------------------------------------|
|       |              |                          |                      |            |           | Ctrl vs <i>daf-2</i> | Ctrl vs <i>daf-16</i> | <i>daf-2</i> vs <i>daf-2;daf-16</i> |
| 1     | N2           | Ctrl RNAi                | 4.25                 | 0.10       | 20/20     | 1.6e-9               | 1                     | 0                                   |
|       |              | <i>daf-2</i> RNAi        | 6.45                 | 0.22       | 20/20     |                      |                       |                                     |
|       |              | <i>daf-16</i> RNAi       | 4.35                 | 0.11       | 20/20     |                      |                       |                                     |
|       |              | <i>daf-16;daf-2</i> RNAi | 4.1                  | 0.07       | 20/20     |                      |                       |                                     |
| 2     | N2           | Ctrl RNAi                | 6.5                  | 0.21       | 20/20     | 5.5e-6               | 1                     | 9.5e-8                              |
|       |              | <i>daf-2</i> RNAi        | 8.55                 | 0.25       | 20/20     |                      |                       |                                     |
|       |              | <i>daf-16</i> RNAi       | 6.3                  | 0.26       | 20/20     |                      |                       |                                     |
|       |              | <i>daf-16;daf-2</i> RNAi | 6                    | 0.19       | 20/20     |                      |                       |                                     |
| 3     | N2           | Ctrl RNAi                | 6.8                  | 0.19       | 20/20     | 7.8e-9               | 0.0013                | 0                                   |
|       |              | <i>daf-2</i> RNAi        | 9.79                 | 0.22       | 20/20     |                      |                       |                                     |
|       |              | <i>daf-16</i> RNAi       | 5.8                  | 0.15       | 20/20     |                      |                       |                                     |
|       |              | <i>daf-16;daf-2</i> RNAi | 6                    | 0.14       | 20/20     |                      |                       |                                     |
| 1     | TU3401       | Ctrl RNAi                | 7                    | 0.41       | 20/20     | 0.019                | 1                     | 0.0002                              |
|       |              | <i>daf-2</i> RNAi        | 8.85                 | 0.28       | 20/20     |                      |                       |                                     |
|       |              | <i>daf-16</i> RNAi       | 6.85                 | 0.22       | 20/20     |                      |                       |                                     |
|       |              | <i>daf-16;daf-2</i> RNAi | 7.35                 | 0.19       | 20/20     |                      |                       |                                     |
| 2     | TU3401       | Ctrl RNAi                | 5.25                 | 0.10       | 20/20     | 0                    | 0.07                  | 4.9e-8                              |
|       |              | <i>daf-2</i> RNAi        | 6.95                 | 0.05       | 20/20     |                      |                       |                                     |
|       |              | <i>daf-16</i> RNAi       | 5.7                  | 0.16       | 20/20     |                      |                       |                                     |
|       |              | <i>daf-16;daf-2</i> RNAi | 5.4                  | 0.15       | 20/20     |                      |                       |                                     |
| 3     | TU3401       | Ctrl RNAi                | 8.06                 | 0.24       | 20/20     | 1.4e-6               | 0.0042                | 0                                   |
|       |              | <i>daf-2</i> RNAi        | 10.08                | 0.22       | 20/20     |                      |                       |                                     |
|       |              | <i>daf-16</i> RNAi       | 6.95                 | 0.18       | 20/20     |                      |                       |                                     |
|       |              | <i>daf-16;daf-2</i> RNAi | 6.9                  | 0.22       | 20/20     |                      |                       |                                     |
| 1     | VP303        | Ctrl RNAi                | 6.2                  | 0.11       | 20/20     | 2.3e-5               | 0.004                 | 0.0041                              |
|       |              | <i>daf-2</i> RNAi        | 7.6                  | 0.23       | 20/20     |                      |                       |                                     |
|       |              | <i>daf-16</i> RNAi       | 7                    | 0.18       | 20/20     |                      |                       |                                     |
|       |              | <i>daf-16;daf-2</i> RNAi | 6.25                 | 0.25       | 20/20     |                      |                       |                                     |
| 2     | VP303        | Ctrl RNAi                | 7.35                 | 0.19       | 20/20     | 3.5e-8               | 0.0005                | 0                                   |
|       |              | <i>daf-2</i> RNAi        | 9.55                 | 0.11       | 20/20     |                      |                       |                                     |
|       |              | <i>daf-16</i> RNAi       | 8.55                 | 0.13       | 20/20     |                      |                       |                                     |
|       |              | <i>daf-16;daf-2</i> RNAi | 7.25                 | 0.12       | 20/20     |                      |                       |                                     |
| 3     | VP303        | Ctrl RNAi                | 6.85                 | 0.15       | 20/20     | 3.5e-8               | 0.0005                | 0                                   |
|       |              | <i>daf-2</i> RNAi        | 8.35                 | 0.20       | 17/17     |                      |                       |                                     |
|       |              | <i>daf-16</i> RNAi       | 6.55                 | 0.17       | 20/20     |                      |                       |                                     |
|       |              | <i>daf-16;daf-2</i> RNAi | 6.5                  | 0.22       | 20/20     |                      |                       |                                     |
| 1     | NR222        | Ctrl RNAi                | 6                    | 0.20       | 20/20     | 0.14                 | 0.017                 | 0.0001                              |
|       |              | <i>daf-2</i> RNAi        | 6.65                 | 0.23       | 20/20     |                      |                       |                                     |
|       |              | <i>daf-16</i> RNAi       | 5.25                 | 0.16       | 20/20     |                      |                       |                                     |
|       |              | <i>daf-16;daf-2</i> RNAi | 5.4                  | 0.13       | 20/20     |                      |                       |                                     |
| 2     | NR222        | Ctrl RNAi                | 6.3                  | 0.14       | 20/20     | 0.017                | 0.17                  | 3.5e-5                              |
|       |              | <i>daf-2</i> RNAi        | 7                    | 0.16       | 20/20     |                      |                       |                                     |
|       |              | <i>daf-16</i> RNAi       | 6.7                  | 0.16       | 20/20     |                      |                       |                                     |
|       |              | <i>daf-16;daf-2</i> RNAi | 6.1                  | 0.07       | 20/20     |                      |                       |                                     |
| 3     | NR222        | Ctrl RNAi                | 6.9                  | 0.19       | 20/20     | 0.24                 | 1.80E-05              | 2.2e-6                              |
|       |              | <i>daf-2</i> RNAi        | 7.45                 | 0.26       | 20/20     |                      |                       |                                     |
|       |              | <i>daf-16</i> RNAi       | 5.45                 | 0.17       | 20/20     |                      |                       |                                     |
|       |              | <i>daf-16;daf-2</i> RNAi | 5.6                  | 0.13       | 20/20     |                      |                       |                                     |
| 1     | NL2098       | Ctrl RNAi                | 6.5                  | 0.15       | 20/20     | 1                    | 0.16                  | 0.88                                |
|       |              | <i>daf-2</i> RNAi        | 6.35                 | 0.11       | 20/20     |                      |                       |                                     |
|       |              | <i>daf-16</i> RNAi       | 7                    | 0.19       | 20/20     |                      |                       |                                     |
|       |              | <i>daf-16;daf-2</i> RNAi | 6.2                  | 0.09       | 20/20     |                      |                       |                                     |
| 2     | NL2098       | Ctrl RNAi                | 5.2                  | 0.13       | 20/20     | 0.98                 | 1                     | 0.52                                |
|       |              | <i>daf-2</i> RNAi        | 5.4                  | 0.11       | 20/20     |                      |                       |                                     |
|       |              | <i>daf-16</i> RNAi       | 5.35                 | 0.18       | 20/20     |                      |                       |                                     |
|       |              | <i>daf-16;daf-2</i> RNAi | 5.65                 | 0.18       | 20/20     |                      |                       |                                     |
| 1     | NR350        | Ctrl RNAi                | 4.35                 | 0.16       | 20/20     | 1                    | 1                     | 0.39                                |
|       |              | <i>daf-2</i> RNAi        | 4.2                  | 0.09       | 20/20     |                      |                       |                                     |
|       |              | <i>daf-16</i> RNAi       | 4.3                  | 0.12       | 20/20     |                      |                       |                                     |
|       |              | <i>daf-16;daf-2</i> RNAi | 4.45                 | 0.13       | 20/20     |                      |                       |                                     |
| 2     | NR350        | Ctrl RNAi                | 5.7                  | 0.17       | 20/20     | 1                    | 1                     | 1                                   |
|       |              | <i>daf-2</i> RNAi        | 5.85                 | 0.19       | 20/20     |                      |                       |                                     |
|       |              | <i>daf-16</i> RNAi       | 5.8                  | 0.27       | 20/20     |                      |                       |                                     |
|       |              | <i>daf-16;daf-2</i> RNAi | 5.65                 | 0.18       | 20/20     |                      |                       |                                     |

**Table S3. (A) Statistics of the Independent Dauer Assay. Related to Figure S1**

|               | N2       |       | <i>daf-2</i> |       | <i>daf-16</i> |       | N- <i>daf-2</i> KO |       | I- <i>daf-2</i> KO |       | N2    | <i>daf-2</i> | <i>daf-16</i> | N- <i>daf-2</i> KO | I- <i>daf-2</i> KO |
|---------------|----------|-------|--------------|-------|---------------|-------|--------------------|-------|--------------------|-------|-------|--------------|---------------|--------------------|--------------------|
|               | normal   | dauer | normal       | dauer | normal        | dauer | normal             | dauer | normal             | dauer |       |              |               |                    |                    |
| <b>Exp #1</b> | 196      | 0     | 0            | 78    | 158           | 0     | 60                 | 27    | 88                 | 0     | 0     | 100          | 0             | 31.0               | 0                  |
| <b>Exp #2</b> | 70       | 0     | 0            | 31    | 73            | 0     | 54                 | 8     | 35                 | 0     | 0     | 100          | 0             | 12.9               | 0                  |
|               | 62       | 0     | 0            | 29    | 63            | 0     | 47                 | 4     | 46                 | 0     | 0     | 100          | 0             | 7.8                | 0                  |
| <b>Exp #3</b> | 67       | 0     | 0            | 28    | 66            | 0     | 45                 | 8     | 40                 | 0     | 0     | 100          | 0             | 15.1               | 0                  |
|               | 108      | 0     | 0            | 25    | 83            | 0     | 91                 | 12    | 105                | 0     | 0     | 100          | 0             | 11.7               | 0                  |
| <b>Exp #4</b> | 114      | 0     | 0            | 28    | 90            | 0     | 105                | 7     | 105                | 0     | 0     | 100          | 0             | 6.3                | 0                  |
|               | 132      | 0     | 0            | 32    | 130           | 0     | 80                 | 15    | 222                | 0     | 0     | 100          | 0             | 15.8               | 0                  |
| <b>Exp #5</b> | 129      | 0     | 0            | 50    | 133           | 0     | 75                 | 10    | 163                | 0     | 0     | 100          | 0             | 11.8               | 0                  |
|               | 83       | 0     | 0            | 30    | 121           | 0     | 97                 | 11    | 142                | 0     | 0     | 100          | 0             | 10.2               | 0                  |
|               | 82       | 0     | 0            | 49    | 103           | 0     | 60                 | 6     | 133                | 0     | 0     | 100          | 0             | 9.1                | 0                  |
|               | n = 1043 |       | n = 380      |       | n = 1020      |       | n = 822            |       | n = 1079           |       | 0 ± 0 | 100 ± 0      | 0 ± 0         | 13 ± 7.0           | 0 ± 0              |

**Table S3. (B) Statistics of the Independent Dauer Assay. Related to Figure S1**

|                                          |         |
|------------------------------------------|---------|
| ANOVA summary                            |         |
| F                                        | 571.3   |
| P value                                  | <0.0001 |
| P value summary                          | ****    |
| Significant diff. among means (P < 0.05) | Yes     |
| R square                                 | 0.9913  |

| <b>Multiple comparison (Dunn's multiple comparisons test)</b> |                 |              |         |                  |
|---------------------------------------------------------------|-----------------|--------------|---------|------------------|
| Dunn's multiple comparisons test                              | Mean rank diff. | Significant? | Summary | Adjusted P Value |
| N2 vs. <i>daf-2</i>                                           | -30             | Yes          | ****    | <0.0001          |
| N2 vs. <i>daf-16</i>                                          | 0               | No           | ns      | >0.9999          |
| N2 vs. N- <i>daf-2</i> KO                                     | -20             | Yes          | **      | 0.005            |
| N2 vs. I- <i>daf-2</i> KO                                     | 0               | No           | ns      | >0.9999          |
| <i>daf-2</i> vs. <i>daf-16</i>                                | 30              | Yes          | ****    | <0.0001          |
| <i>daf-2</i> vs. N- <i>daf-2</i> KO                           | 10              | No           | ns      | 0.8168           |
| <i>daf-2</i> vs. I- <i>daf-2</i> KO                           | 30              | Yes          | ****    | <0.0001          |
| <i>daf-16</i> vs. N- <i>daf-2</i> KO                          | -20             | Yes          | **      | 0.005            |
| <i>daf-16</i> vs. I- <i>daf-2</i> KO                          | 0               | No           | ns      | >0.9999          |
| N- <i>daf-2</i> KO vs. I- <i>daf-2</i> KO                     | 20              | Yes          | **      | 0.005            |

**Table S4. Statistics of the Independent Lifespan Experiments 2. Related to Figure 1**

| Trial | Strain                     | Mean lifespan (Days) | Std. error | Worms (n) | Bonferroni P-value |                        |                             |                               |                               |
|-------|----------------------------|----------------------|------------|-----------|--------------------|------------------------|-----------------------------|-------------------------------|-------------------------------|
|       |                            |                      |            |           | vs WT              | vs <i>daf-2(e1370)</i> | vs neuronal <i>daf-2</i> KO | vs intestinal <i>daf-2</i> KO | vs hypodermal <i>daf-2</i> KO |
| # 1   | WT                         | 21.51                | 0.46       | 61 / 101  | -                  | -                      | < 0.0001                    | < 0.0001                      | 0.0218                        |
|       | Neuronal <i>daf-2</i> KO   | 36.47                | 2.32       | 26 / 80   |                    |                        | -                           | 0.0848                        | < 0.0001                      |
|       | Intestinal <i>daf-2</i> KO | 32.32                | 1.16       | 55 / 80   |                    |                        |                             | -                             | < 0.0001                      |
|       | Hypodermal <i>daf-2</i> KO | 23.32                | 1.07       | 34 / 80   |                    |                        |                             |                               | -                             |
| # 2   | WT                         | 22.05                | 0.36       | 75 / 100  | -                  | < 0.0001               | < 0.0001                    | < 0.0001                      | 0.2221                        |
|       | <i>daf-2(e1370)</i>        | 43.27                | 2.15       | 54 / 100  |                    | -                      | 0.0001                      | 0.0001                        | < 0.0001                      |
|       | Neuronal <i>daf-2</i> KO   | 33.58                | 1.59       | 47 / 80   |                    |                        | -                           | 0.5565                        | < 0.0001                      |
|       | Intestinal <i>daf-2</i> KO | 34.83                | 1.44       | 61 / 81   |                    |                        |                             | -                             | < 0.0001                      |
| # 3   | Hypodermal <i>daf-2</i> KO | 22.63                | 0.67       | 48 / 80   |                    |                        |                             |                               | -                             |
|       | WT                         | 20.94                | 0.54       | 62 / 100  | -                  | < 0.0001               | < 0.0001                    | < 0.0001                      | < 0.0001                      |
|       | <i>daf-2(e1370)</i>        | 42.92                | 2.48       | 39 / 80   |                    | -                      | 1                           | 0.9405                        | 0.003                         |
|       | Neuronal <i>daf-2</i> KO   | 47.26                | 2.27       | 45 / 80   |                    |                        | -                           | 0.0278                        | < 0.0001                      |
| # 3   | Intestinal <i>daf-2</i> KO | 40.24                | 1.44       | 52 / 80   |                    |                        |                             | -                             | 0.0029                        |
|       | Hypodermal <i>daf-2</i> KO | 31.64                | 1.91       | 21 / 80   |                    |                        |                             |                               | -                             |





**Table S5. (B) Statistics of the Independent Lifespan Experiments 3\_2 (2-way ANOVA post hoc Sidak's test). Related to Figure 1 and S2**

| Trial | Sidak's multiple comparisons test                               | Mean Diff. | 95.00% CI of diff. | Significant? | Summary | Adjusted P Value |
|-------|-----------------------------------------------------------------|------------|--------------------|--------------|---------|------------------|
| #1    | WT<br>vs<br><i>unc-31</i>                                       | -6.325     | -10.94 to -1.713   | Yes          | **      | 0.006            |
|       | <i>N-daf-2</i> KO<br>vs<br><i>unc-31</i> ; <i>N-daf-2</i><br>KO | -15.59     | -20.20 to -10.98   | Yes          | ****    | <0.0001          |
|       | <i>I-daf-2</i> KO<br>vs<br><i>unc-31</i> ; <i>I-daf-2</i><br>KO | -4.1       | -8.712 to 0.5120   | No           | ns      | 0.0903           |
| #2    | WT<br>vs<br><i>unc-31</i>                                       | -7.818     | -11.60 to -4.036   | Yes          | ***     | 0.0001           |
|       | <i>N-daf-2</i> KO<br>vs<br><i>unc-31</i> ; <i>N-daf-2</i><br>KO | -14.21     | -17.99 to -10.42   | Yes          | ****    | <0.0001          |
|       | <i>I-daf-2</i> KO<br>vs<br><i>unc-31</i> ; <i>I-daf-2</i><br>KO | -3.218     | -6.999 to 0.5644   | No           | ns      | 0.1099           |

|                             |                   |              |              |              |              |               |              |              |              |
|-----------------------------|-------------------|--------------|--------------|--------------|--------------|---------------|--------------|--------------|--------------|
| Mean lifespan of replicates | #1                | WT           |              |              |              | <i>unc-31</i> |              |              |              |
|                             | WT                | 25.41 (n=25) | 24.35 (n=25) | 21.13 (n=25) | 27 (n=25)    | 33.81 (n=25)  | 31.45 (n=25) | 31.6 (n=25)  | 26.33 (n=25) |
|                             | <i>N-daf-2</i> KO | 36.1 (n=20)  | 34.32 (n=20) | 34 (n=20)    | 38.37 (n=20) | 49.68 (n=20)  | 53.06 (n=20) | 52.12 (n=20) | 50.3 (n=20)  |
|                             | <i>I-daf-2</i> KO | 40.33 (n=20) | 38.97 (n=20) | 39.88 (n=20) | 34.65 (n=20) | 41.8 (n=20)   | 46.56 (n=20) | 40.47 (n=21) | 41.4 (n=20)  |
| Mean lifespan of replicates | #2                | WT           |              |              |              | <i>unc-31</i> |              |              |              |
|                             | WT                | 24.91 (n=26) | 24.33 (n=26) | 23.27 (n=25) | 19 (n=25)    | 29.05 (n=25)  | 31.95 (n=26) | 30.89 (n=26) | 30.89 (n=25) |
|                             | <i>N-daf-2</i> KO | 39.39 (n=21) | 35.2 (n=20)  | 37.67 (n=20) | 38.44 (n=20) | 50.16 (n=20)  | 53.94 (n=20) | 50.68 (n=20) | 52.74 (n=20) |
|                             | <i>I-daf-2</i> KO | 40.89 (n=20) | 42.77 (n=21) | 40.83 (n=20) | 39.38 (n=20) | 48.28 (n=21)  | 42.1 (n=20)  | 43.74 (n=20) | 42.62 (n=20) |

Table S6. Statistics of the Independent Reproductive Span Experiments 1. Related to Figure S1

| Trial            | Strain                          | Mean reproductive lifespan (Days) | Std. error | Worms   | Bonferroni P-value |                        |                             |                               |                               |                                    |                     |
|------------------|---------------------------------|-----------------------------------|------------|---------|--------------------|------------------------|-----------------------------|-------------------------------|-------------------------------|------------------------------------|---------------------|
|                  |                                 |                                   |            |         | vs WT              | vs <i>daf-2(e1370)</i> | vs Neuronal <i>daf-2</i> KO | vs Intestinal <i>daf-2</i> KO | vs Hypodermal <i>daf-2</i> KO | vs Somatic gonadal <i>daf-2</i> KO | vs mock (gfp sgRNA) |
| # 1              | WT                              | 5.11                              | 0.13       | 19 / 20 | -                  | 0.0001                 | 0.0001                      | 0.0052                        | 1                             |                                    |                     |
|                  | <i>daf-2(e1370)</i>             | 6.53                              | 0.25       | 15 / 20 |                    | -                      | 0.1538                      | 1                             | 0.0201                        |                                    |                     |
|                  | Neuronal <i>daf-2</i> KO        | 7.86                              | 0.47       | 7 / 20  |                    |                        | -                           | 1                             | 0.0047                        |                                    |                     |
|                  | Intestinal <i>daf-2</i> KO      | 7                                 | 0.53       | 6 / 20  |                    |                        |                             | -                             | 0.0756                        |                                    |                     |
|                  | Hypodermal <i>daf-2</i> KO      | 5.25                              | 0.27       | 12 / 20 |                    |                        |                             |                               | -                             |                                    |                     |
| # 2              | WT                              | 5.32                              | 0.09       | 24 / 30 | -                  | <0.0001                | <0.0001                     | <0.0001                       | 0.0596                        | 0.1728                             | 0.075               |
|                  | <i>daf-2(e1370)</i>             | 7.44                              | 0.33       | 21 / 30 |                    | -                      | 0.9872                      | 1                             | 0.0604                        | 0.0274                             | 1                   |
|                  | Neuronal <i>daf-2</i> KO        | 8.29                              | 0.43       | 9 / 30  |                    |                        | -                           | 1                             | 0.0047                        | 0.0018                             | 0.0912              |
|                  | Intestinal <i>daf-2</i> KO      | 8.75                              | 0.88       | 10 / 30 |                    |                        |                             | -                             | 0.0168                        | 0.0032                             | 0.1272              |
|                  | Hypodermal <i>daf-2</i> KO      | 6.17                              | 0.29       | 11 / 30 |                    |                        |                             |                               | -                             | 1                                  | 1                   |
|                  | Somatic gonadal <i>daf-2</i> KO | 6.16                              | 0.29       | 22 / 30 |                    |                        |                             |                               |                               | -                                  | 1                   |
|                  | mock (gfp sgRNA)                | 6.67                              | 0.45       | 17 / 30 |                    |                        |                             |                               |                               |                                    | -                   |
| # 3              | WT                              | 5.81                              | 0.19       | 23 / 30 | -                  | 0.0001                 | 0.0001                      | 0.0003                        | 0.4365                        | 0.6741                             | 1                   |
|                  | <i>daf-2(e1370)</i>             | 7.41                              | 0.28       | 22 / 30 |                    | -                      | 1                           | 1                             | 0.2731                        | 0.4672                             | 0.0001              |
|                  | Neuronal <i>daf-2</i> KO        | 8.19                              | 0.47       | 17 / 30 |                    |                        | -                           | 1                             | 0.3932                        | 0.0683                             | 0.0003              |
|                  | Intestinal <i>daf-2</i> KO      | 7.72                              | 0.38       | 9 / 30  |                    |                        |                             | -                             | 0.3013                        | 0.2511                             | 0.0002              |
|                  | Hypodermal <i>daf-2</i> KO      | 6.23                              | 0.2        | 13 / 30 |                    |                        |                             |                               | -                             | 1                                  | 0.369               |
|                  | Somatic gonadal <i>daf-2</i> KO | 6.33                              | 0.31       | 9 / 30  |                    |                        |                             |                               |                               | -                                  | 0.7356              |
| mock (gfp sgRNA) | 5.83                            | 0.16                              | 22 / 29    |         |                    |                        |                             |                               |                               | -                                  |                     |

**Table S7. Statistics of the Independent Lifespan Experiments 4. Related to Figure S1**

| Trial | Strain             | Mean lifespan (Days) | Std. error | Worms (n) | Bonferroni P-value |                       |                     |
|-------|--------------------|----------------------|------------|-----------|--------------------|-----------------------|---------------------|
|       |                    |                      |            |           | vs WT              | vs mock (empty sgRNA) | vs mock (gfp sgRNA) |
| # 1   | WT                 | 21.39                | 0.57       | 76 / 100  | -                  | 0.797                 | 1                   |
|       | mock (empty sgRNA) | 22.11                | 0.9        | 43 / 100  | -                  | -                     | 0.808               |
|       | mock (gfp sgRNA)   | 20.99                | 0.85       | 35 / 100  | -                  | -                     | -                   |
| # 2   | WT                 | 23.22                | 0.59       | 82 / 100  | -                  | 0.235                 | 0.937               |
|       | mock (empty sgRNA) | 25.11                | 0.86       | 38 / 100  | -                  | -                     | 0.050               |
|       | mock (gfp sgRNA)   | 22.88                | 0.54       | 63 / 100  | -                  | -                     | -                   |
| # 3   | WT                 | 24.35                | 0.72       | 77 / 100  | -                  | 0.502                 | 1                   |
|       | mock (empty sgRNA) | 26.05                | 1.11       | 28 / 60   | -                  | -                     | 0.374               |
|       | mock (gfp sgRNA)   | 23.68                | 0.88       | 56 / 100  | -                  | -                     | -                   |

**Table S8. (A) Statistics of the Independent DAF-16::GFP Nuclear Accumulation Experiments 1. Figure 3 and S2**

|               | WT      |           |           |           | N- <i>daf-2</i> KO |           |           |           | I- <i>daf-2</i> KO |           |           |           |
|---------------|---------|-----------|-----------|-----------|--------------------|-----------|-----------|-----------|--------------------|-----------|-----------|-----------|
|               | Head    |           | Intestine |           | Head               |           | Intestine |           | Head               |           | Intestine |           |
|               | Nuclear | Cytosolic | Nuclear   | Cytosolic | Nuclear            | Cytosolic | Nuclear   | Cytosolic | Nuclear            | Cytosolic | Nuclear   | Cytosolic |
| <b>Exp. 1</b> | 0       | 51        | 0         | 51        | 36                 | 8         | 41        | 4         | 2                  | 8         | 8         | 2         |
| <b>Exp. 2</b> | 0       | 31        | 0         | 59        | 40                 | 6         | 66        | 5         | 16                 | 16        | 47        | 3         |
| <b>Exp. 3</b> | 0       | 49        | 0         | 98        | 43                 | 6         | 80        | 8         | 14                 | 17        | 41        | 5         |
| <b>Exp. 4</b> | 8       | 27        | 2         | 59        | 21                 | 0         | 26        | 3         | 15                 | 8         | 33        | 2         |

**Table S8. (B) Statistics of the Independent DAF-16::GFP Nuclear Accumulation Experiments 1. Figure 3 and S2**

|                                  |                                                     |                   |                           |                     |                |                         |
|----------------------------------|-----------------------------------------------------|-------------------|---------------------------|---------------------|----------------|-------------------------|
| Head                             | <b>ANOVA summary</b>                                |                   |                           |                     |                |                         |
|                                  | <b>F</b>                                            | 38.49             |                           |                     |                |                         |
|                                  | <b>P value</b>                                      | <0.0001           |                           |                     |                |                         |
|                                  | <b>P value summary</b>                              | ****              |                           |                     |                |                         |
|                                  | <b>Significant diff. among means (P &lt; 0.05)?</b> | Yes               |                           |                     |                |                         |
|                                  | <b>R square</b>                                     | 0.8953            |                           |                     |                |                         |
|                                  | <b>Tukey's multiple comparisons test</b>            |                   |                           |                     |                |                         |
|                                  |                                                     | <b>Mean Diff.</b> | <b>95.00% CI of diff.</b> | <b>Significant?</b> | <b>Summary</b> | <b>Adjusted P Value</b> |
|                                  | <b>WT vs. N-daf-2 KO</b>                            | -83.42            | -110.0 to -56.86          | Yes                 | ****           | <0.0001                 |
|                                  | <b>WT vs. I-daf-2 KO</b>                            | -39.38            | -65.94 to -12.82          | Yes                 | **             | 0.0064                  |
| <b>N-daf-2 KO vs. I-daf-2 KO</b> | 44.04                                               | 17.48 to 70.60    | Yes                       | **                  | 0.0032         |                         |
| Body                             | <b>ANOVA summary</b>                                |                   |                           |                     |                |                         |
|                                  | <b>F</b>                                            | 686.6             |                           |                     |                |                         |
|                                  | <b>P value</b>                                      | <0.0001           |                           |                     |                |                         |
|                                  | <b>P value summary</b>                              | ****              |                           |                     |                |                         |
|                                  | <b>Significant diff. among means (P &lt; 0.05)?</b> | Yes               |                           |                     |                |                         |
|                                  | <b>R square</b>                                     | 0.9935            |                           |                     |                |                         |
|                                  | <b>Tukey's multiple comparisons test</b>            |                   |                           |                     |                |                         |
|                                  |                                                     | <b>Mean Diff.</b> | <b>95.00% CI of diff.</b> | <b>Significant?</b> | <b>Summary</b> | <b>Adjusted P Value</b> |
|                                  | <b>WT vs. N-daf-2 KO</b>                            | -90.74            | -98.56 to -82.92          | Yes                 | ****           | <0.0001                 |
|                                  | <b>WT vs. I-daf-2 KO</b>                            | -88.94            | -96.75 to -81.12          | Yes                 | ****           | <0.0001                 |
| <b>N-daf-2 KO vs. I-daf-2 KO</b> | 1.804                                               | -6.013 to 9.621   | No                        | ns                  | 0.8            |                         |

**Table S9. Statistics of the Independent DAF-16::GFP Nuclear Accumulation Experiments 2. Related to Figure 3**  
ANOVA summary

|                                                     |         |
|-----------------------------------------------------|---------|
| <b>F</b>                                            | 280.6   |
| <b>P value</b>                                      | <0.0001 |
| <b>P value summary</b>                              | ****    |
| <b>Significant diff. among means (P &lt; 0.05)?</b> | Yes     |
| <b>R squared</b>                                    | 0.9791  |

| <b>Dunnett's multiple comparisons test</b> | <b>Mean Diff.</b> | <b>95.00% CI of diff.</b> | <b>Significant?</b> | <b>Summary</b> | <b>Adjusted P Value</b> |                       |
|--------------------------------------------|-------------------|---------------------------|---------------------|----------------|-------------------------|-----------------------|
| <b>Wild-type vs. N-<i>daf-2</i> KO</b>     | -7.36             | -8.193 to -6.527          | Yes                 | ****           | <0.0001                 | vs N- <i>daf-2</i> KO |
| <b>Wild-type vs. I-<i>daf-2</i> KO</b>     | -1.24             | -2.073 to -0.4075         | Yes                 | **             | 0.0054                  | vs I- <i>daf-2</i> KO |

|                | <b>Wild-type</b> | <b>N-<i>daf-2</i> KO</b> | <b>I-<i>daf-2</i> KO</b> |
|----------------|------------------|--------------------------|--------------------------|
| <b>Exp. #1</b> | 0                | 5.9                      | 0.9                      |
| <b>Exp. #2</b> | 0.2              | 7.7                      | 1.4                      |
| <b>Exp. #3</b> | 0                | 7.5                      | 1.4                      |
| <b>Exp. #4</b> | 0                | 8                        | 1.5                      |
| <b>Exp. #5</b> | 0.1              | 8                        | 1.3                      |

**Table S10. Statistics of the Independent Lifespan Experiments 5. Related to Figure 4**

| Trial | Strain                                                 | Mean lifespan (Days) | Std. error | Worms (n) | Bonferroni P-value     |                                 |                                                  |                                                           |
|-------|--------------------------------------------------------|----------------------|------------|-----------|------------------------|---------------------------------|--------------------------------------------------|-----------------------------------------------------------|
|       |                                                        |                      |            |           | vs intestine ctrl RNAi | vs intestine <i>daf-16</i> RNAi | vs neuronal <i>daf-2</i> KO; intestine ctrl RNAi | vs neuronal <i>daf-2</i> KO; intestine <i>daf-16</i> RNAi |
| # 1   | Intestine ctrl RNAi                                    | 17.68                | 0.2        | 37 / 80   | -                      | 0.0001                          | <0.0001                                          | 0.0009                                                    |
|       | Intestine <i>daf-16</i> RNAi                           | 15.73                | 0.27       | 55 / 80   |                        | -                               | <0.0001                                          | <0.0001                                                   |
|       | Neuronal <i>daf-2</i> KO; intestine ctrl RNAi          | 24.41                | 1.11       | 32 / 80   |                        |                                 | -                                                | 0.0001                                                    |
|       | Neuronal <i>daf-2</i> KO; intestine <i>daf-16</i> RNAi | 19.79                | 0.51       | 43 / 80   |                        |                                 |                                                  | -                                                         |
| # 2   | intestine ctrl RNAi                                    | 18.3                 | 0.31       | 57 / 100  | -                      | 0.0007                          | <0.0001                                          | 0.0888                                                    |
|       | intestine <i>daf-16</i> RNAi                           | 16.33                | 0.37       | 25 / 100  |                        | -                               | <0.0001                                          | <0.0001                                                   |
|       | Neuronal <i>daf-2</i> KO; intestine ctrl RNAi          | 29.11                | 1.03       | 47 / 100  |                        |                                 | -                                                | <0.0001                                                   |
|       | Neuronal <i>daf-2</i> KO; intestine <i>daf-16</i> RNAi | 19.39                | 0.61       | 53 / 100  |                        |                                 |                                                  | -                                                         |
| # 3   | intestine ctrl RNAi                                    | 18.74                | 0.29       | 65 / 100  | -                      | 0.0001                          | <0.0001                                          | 0.0303                                                    |
|       | intestine <i>daf-16</i> RNAi                           | 16.96                | 0.27       | 64 / 100  |                        | -                               | <0.0001                                          | <0.0001                                                   |
|       | Neuronal <i>daf-2</i> KO; intestine ctrl RNAi          | 28.32                | 0.99       | 56 / 100  |                        |                                 | -                                                | <0.0001                                                   |
|       | Neuronal <i>daf-2</i> KO; intestine <i>daf-16</i> RNAi | 21.09                | 0.78       | 72 / 100  |                        |                                 |                                                  | -                                                         |

  

| Trial | Strain                                               | Mean lifespan (Days) | Std. error | Worms (n) | Bonferroni P-value  |                              |                                               |                                                         |
|-------|------------------------------------------------------|----------------------|------------|-----------|---------------------|------------------------------|-----------------------------------------------|---------------------------------------------------------|
|       |                                                      |                      |            |           | vs neuron ctrl RNAi | vs neuron <i>daf-16</i> RNAi | vs intestine <i>daf-2</i> KO; neuronctrl RNAi | vs intestine <i>daf-2</i> KO; neuron <i>daf-16</i> RNAi |
| # 1   | Neuron ctrl RNAi                                     | 18.5                 | 0.46       | 53 / 80   | -                   | <0.0001                      | <0.0001                                       | 0.0002                                                  |
|       | Neuron <i>daf-16</i> RNAi                            | 14.78                | 0.27       | 56 / 80   |                     | -                            | <0.0001                                       | 0.0628                                                  |
|       | Intestin <i>daf-2</i> KO; neuron ctrl RNAi           | 30.05                | 1.02       | 49 / 79   |                     |                              | -                                             | <0.0001                                                 |
|       | Intestine <i>daf-2</i> KO; neuron <i>daf-16</i> RNAi | 15.88                | 0.42       | 54 / 77   |                     |                              |                                               | -                                                       |
| # 2   | Neuron ctrl RNAi                                     | 17.76                | 0.31       | 38 / 81   | -                   | 0                            | <0.0001                                       | 8.00E-04                                                |
|       | Neuron <i>daf-16</i> RNAi                            | 14.74                | 0.37       | 56 / 80   |                     | -                            | <0.0001                                       | 0.1849                                                  |
|       | Intestin <i>daf-2</i> KO; neuron ctrl RNAi           | 30.11                | 1.03       | 53 / 81   |                     |                              | -                                             | <0.0001                                                 |
|       | Intestine <i>daf-2</i> KO; neuron <i>daf-16</i> RNAi | 15.47                | 0.61       | 58 / 80   |                     |                              |                                               | -                                                       |



Table S11. Statistics of the Independent Reproductive Span Experiments 2. Related to Figure S3

| Trial | Strain                                                 | Mean reproductive span (Days) | Std. error | Worms (n) | Bonferroni P-value     |                                |                                 |                                                  |                                                          |                                                           |
|-------|--------------------------------------------------------|-------------------------------|------------|-----------|------------------------|--------------------------------|---------------------------------|--------------------------------------------------|----------------------------------------------------------|-----------------------------------------------------------|
|       |                                                        |                               |            |           | vs intestine ctrl RNAi | vs intestine <i>daf-2</i> RNAi | vs intestine <i>daf-16</i> RNAi | vs neuronal <i>daf-2</i> KO; intestine ctrl RNAi | vs neuronal <i>daf-2</i> KO; intestine <i>daf-2</i> RNAi | vs neuronal <i>daf-2</i> KO; intestine <i>daf-16</i> RNAi |
| # 1   | intestine ctrl RNAi                                    | 3.47                          | 0.12       | 27/28     | -                      | 0.0015                         | 1                               | <0.0001                                          | <0.0001                                                  | 1                                                         |
|       | intestine <i>daf-2</i> RNAi                            | 4.2                           | 0.13       | 26/28     |                        | -                              | 0.0006                          | 0.7126                                           | 0.0151                                                   | 0.1135                                                    |
|       | intestine <i>daf-16</i> RNAi                           | 3.38                          | 0.13       | 28/30     |                        |                                | -                               | <0.0001                                          | <0.0001                                                  | 1                                                         |
|       | Neuronal <i>daf-2</i> KO; intestine ctrl RNAi          | 4.5                           | 0.16       | 34/37     |                        |                                |                                 | -                                                | 0.3223                                                   | 0.0031                                                    |
|       | Neuronal <i>daf-2</i> KO; intestine <i>daf-2</i> RNAi  | 4.95                          | 0.19       | 36/40     |                        |                                |                                 |                                                  | -                                                        | <0.0001                                                   |
|       | Neuronal <i>daf-2</i> KO; intestine <i>daf-16</i> RNAi | 3.6                           | 0.18       | 35/41     |                        |                                |                                 |                                                  |                                                          | -                                                         |
| # 2   | intestine ctrl RNAi                                    | 3.5                           | 0.13       | 27/30     | -                      |                                | 1                               | <0.0001                                          |                                                          | 0.5807                                                    |
|       | intestine <i>daf-16</i> RNAi                           | 3.43                          | 0.14       | 28/30     |                        |                                | -                               | <0.0001                                          |                                                          | 0.3975                                                    |
|       | Neuronal <i>daf-2</i> KO; intestine ctrl RNAi          | 4.48                          | 0.17       | 35/51     |                        |                                |                                 | -                                                |                                                          | 0.0484                                                    |
|       | Neuronal <i>daf-2</i> KO; intestine <i>daf-16</i> RNAi | 3.85                          | 0.19       | 35/50     |                        |                                |                                 |                                                  |                                                          | -                                                         |

**Table S12. (A) Statistics of the Brood Size of the Individuals. Related to Figure S3**

| VP303 / Ctrl RNAi | N- <i>daf-2</i> KO;VP303 / Ctrl RNAi | VP303 / <i>daf-16</i> RNAi | N- <i>daf-2</i> KO;VP303 / <i>daf-16</i> RNAi |
|-------------------|--------------------------------------|----------------------------|-----------------------------------------------|
| 231               | 291                                  | 181                        | 201                                           |
| 266               | 260                                  | 192                        | 243                                           |
| 181               | 273                                  | 282                        | 241                                           |
| 176               | 257                                  | 173                        | 256                                           |
| 222               | 257                                  | 278                        | 334                                           |
| 209               | 233                                  | 197                        | 178                                           |
| 197               | 200                                  | 244                        | 293                                           |
| 238               | 180                                  | 184                        | 225                                           |
| 210               | 235                                  | 263                        | 221                                           |
| 203               | 253                                  | 203                        | 227                                           |
| 246               | 267                                  | 241                        | 271                                           |
| 123               | 133                                  | 208                        | 179                                           |
| 207               | 261                                  | 224                        | 205                                           |
| 234               | 318                                  | 269                        | 251                                           |
| 309               | 239                                  | 240                        | 240                                           |
| 251               | 200                                  | 228                        | 196                                           |
| 200               | 266                                  | 231                        | 159                                           |
| 138               | 255                                  | 214                        | 190                                           |
| 258               | 241                                  | 213                        | 271                                           |
| 209               | 193                                  | 181                        | 206                                           |
| 157               | 229                                  | 235                        | 258                                           |
| 204               | 221                                  | 117                        | 202                                           |
| 223               | 266                                  | 244                        | 234                                           |
| 218               | 224                                  | 201                        | 155                                           |
|                   | 177                                  | 221                        | 215                                           |
|                   | 230                                  |                            | 127                                           |
|                   | 241                                  |                            | 195                                           |
|                   |                                      |                            | 206                                           |
|                   |                                      |                            | 191                                           |
|                   |                                      |                            | 255                                           |
|                   |                                      |                            | 169                                           |
|                   |                                      |                            | 233                                           |

**Table S12. (B) Statistics of the Brood Size of the Individuals. Related to Figure 3****ANOVA summary**

|                                                     |        |
|-----------------------------------------------------|--------|
| <b>F</b>                                            | 1.775  |
| <b>P value</b>                                      | 0.1566 |
| <b>P value summary</b>                              | ns     |
| <b>Significant diff. among means (P &lt; 0.05)?</b> | No     |
| <b>R square</b>                                     | 0.0487 |

| <b>Tukey's multiple comparisons test</b>                                                    | <b>Mean Diff.</b> | <b>95.00% CI of diff.</b> | <b>Significant?</b> | <b>Summary</b> | <b>Adjusted P Value</b> |
|---------------------------------------------------------------------------------------------|-------------------|---------------------------|---------------------|----------------|-------------------------|
| <b>VP303 / Ctrl RNAi vs. N-<i>daf-2</i> KO;VP303 / Ctrl RNAi</b>                            | -24.12            | -53.49 to 5.253           | No                  | ns             | 0.1462                  |
| <b>VP303 / Ctrl RNAi vs. VP303 / <i>daf-16</i> RNAi</b>                                     | -5.643            | -35.56 to 24.28           | No                  | ns             | 0.9606                  |
| <b>VP303 / Ctrl RNAi vs. N-<i>daf-2</i> KO;VP303 / <i>daf-16</i> RNAi</b>                   | -6.677            | -34.95 to 21.60           | No                  | ns             | 0.9266                  |
| <b>N-<i>daf-2</i> KO;VP303 / Ctrl RNAi vs. VP303 / <i>daf-16</i> RNAi</b>                   | 18.48             | -10.58 to 47.54           | No                  | ns             | 0.35                    |
| <b>N-<i>daf-2</i> KO;VP303 / Ctrl RNAi vs. N-<i>daf-2</i> KO;VP303 / <i>daf-16</i> RNAi</b> | 17.44             | -9.917 to 44.80           | No                  | ns             | 0.3476                  |
| <b>VP303 / <i>daf-16</i> RNAi vs. N-<i>daf-2</i> KO;VP303 / <i>daf-16</i> RNAi</b>          | -1.034            | -28.98 to 26.91           | No                  | ns             | 0.9997                  |

**Table S13. (A) Statistics of the Independent DAF-16::GFP Nuclear Accumulation Experiments 2. Related to Figure 5 and S4**

**Ctrl RNAi**

| WT      |           |           |           | N- <i>daf-2</i> KO |           |           |           | I- <i>daf-2</i> KO |           |           |           |
|---------|-----------|-----------|-----------|--------------------|-----------|-----------|-----------|--------------------|-----------|-----------|-----------|
| Head    |           | Intestine |           | Head               |           | Intestine |           | Head               |           | Intestine |           |
| Nuclear | Cytosolic | Nuclear   | Cytosolic | Nuclear            | Cytosolic | Nuclear   | Cytosolic | Nuclear            | Cytosolic | Nuclear   | Cytosolic |
| 1       | 16        | 1         | 19        | 15                 | 1         | 19        | 1         | 7                  | 7         | 15        | 0         |
| 0       | 34        | 0         | 58        | 17                 | 5         | 22        | 4         | 8                  | 8         | 20        | 0         |
| 0       | 23        | 0         | 33        | 23                 | 5         | 31        | 3         | 6                  | 10        | 21        | 0         |
| 0       | 29        | 0         | 45        | 37                 | 9         | 66        | 7         | 13                 | 14        | 28        | 4         |

***daf-18* RNAi**

| WT      |           |           |           | N- <i>daf-2</i> KO |           |           |           | I- <i>daf-2</i> KO |           |           |           |
|---------|-----------|-----------|-----------|--------------------|-----------|-----------|-----------|--------------------|-----------|-----------|-----------|
| Head    |           | Intestine |           | Head               |           | Intestine |           | Head               |           | Intestine |           |
| Nuclear | Cytosolic | Nuclear   | Cytosolic | Nuclear            | Cytosolic | Nuclear   | Cytosolic | Nuclear            | Cytosolic | Nuclear   | Cytosolic |
| 0       | 26        | 0         | 49        | 19                 | 1         | 13        | 7         | 4                  | 6         | 7         | 3         |
| 0       | 32        | 0         | 48        | 5                  | 6         | 6         | 10        | 4                  | 7         | 11        | 2         |
| 0       | 31        | 0         | 52        | 21                 | 10        | 32        | 18        | 7                  | 12        | 19        | 5         |
| 0       | 26        | 0         | 52        | 21                 | 18        | 42        | 17        | 12                 | 20        | 39        | 12        |

**Table S13. (B) Statistics of the Independent DAF-16::GFP Nuclear Accumulation Experiments 2. Related to Figure 5 and S4**

| Head                                     | ANOVA table | SS               | DF                 | MS           | F (DFn, DFd)      | P value          |
|------------------------------------------|-------------|------------------|--------------------|--------------|-------------------|------------------|
|                                          | Interaction | 270.8            | 2                  | 135.4        | F (2, 18) = 1.425 | P=0.2663         |
|                                          | KO          | 21844            | 2                  | 10922        | F (2, 18) = 115.0 | P<0.0001         |
|                                          | RNAi        | 526.2            | 1                  | 526.2        | F (1, 18) = 5.540 | P=0.0302         |
|                                          | Residual    | 1710             | 18                 | 95           |                   |                  |
| <b>Sidak's multiple comparisons test</b> |             |                  |                    |              |                   |                  |
|                                          |             | Mean Diff.       | 95.00% CI of diff. | Significant? | Summary           | Adjusted P Value |
| <b>Ctrl RNAi - <i>daf-18</i> RNAi</b>    |             |                  |                    |              |                   |                  |
| WT                                       | 1.471       | -16.66 to 19.60  | No                 | ns           |                   | 0.9954           |
| N- <i>daf-2</i> KO                       | 17.89       | -0.2437 to 36.02 | No                 | ns           |                   | 0.0538           |
| I- <i>daf-2</i> KO                       | 8.736       | -9.398 to 26.87  | No                 | ns           |                   | 0.5275           |

| Body                                     | ANOVA table | SS              | DF                 | MS           | F (DFn, DFd)      | P value          |
|------------------------------------------|-------------|-----------------|--------------------|--------------|-------------------|------------------|
|                                          | Interaction | 576.4           | 2                  | 288.2        | F (2, 18) = 4.836 | P=0.0209         |
|                                          | KO          | 34024           | 2                  | 17012        | F (2, 18) = 285.5 | P<0.0001         |
|                                          | RNAi        | 1323            | 1                  | 1323         | F (1, 18) = 22.19 | P=0.0002         |
|                                          | Residual    | 1073            | 18                 | 59.6         |                   |                  |
| <b>Sidak's multiple comparisons test</b> |             |                 |                    |              |                   |                  |
|                                          |             | Mean Diff.      | 95.00% CI of diff. | Significant? | Summary           | Adjusted P Value |
| <b>Ctrl RNAi - <i>daf-18</i> RNAi</b>    |             |                 |                    |              |                   |                  |
| WT                                       | 1.25        | -13.11 to 15.61 | No                 | ns           |                   | 0.9943           |
| N- <i>daf-2</i> KO                       | 23.98       | 9.616 to 38.34  | Yes                | **           |                   | 0.0011           |
| I- <i>daf-2</i> KO                       | 19.31       | 4.949 to 33.67  | Yes                | **           |                   | 0.007            |

**Table S14. Strain List. Related to STAR Method**

| Strain  | Genotype                                                                                                                                                         | Comment                                        |
|---------|------------------------------------------------------------------------------------------------------------------------------------------------------------------|------------------------------------------------|
| N2      |                                                                                                                                                                  | Wild type                                      |
| NL2098  | <i>rrff-1(pk1417) 1</i>                                                                                                                                          | Germline specific RNAi                         |
| NR222   | <i>rde-1(ne219) V</i> (outcrossed 3x); <i>kzIs9[lin26p::nls::gfp + lin-26p::rde-1 + rol-6(su1006)]</i>                                                           | Hypodermis specific RNAi                       |
| NR350   | <i>rde-1(ne219) V</i> (outcrossed 1x); <i>kzIs20[hhlh-1p::rde-1 + sur-5p::nls::gfp]</i>                                                                          | Muscle specific RNAi                           |
| TU3401  | <i>sid-1(pk3321) V</i> (outcrossed 0x); <i>uls69[myo-2p::mCherry + unc-119p::sid-1]</i>                                                                          | Neuron specific RNAi                           |
| VP303   | <i>rde-1(ne219) V</i> (outcrossed 3x); <i>kbIs7[nhx-2p::rde-1; rol-6(su1006)]</i>                                                                                | Intestine specific RNAi                        |
| KN259   | <i>huls33[sod-3::gfp + rol-6(su1006)]</i>                                                                                                                        |                                                |
| TJ356   | <i>zIs356[daf-16::gfp + rol-6(su1006)]</i>                                                                                                                       |                                                |
| FJ224   | <i>unc-31(e298) IV; dpy-11(e224) V</i> (outcrossed 3x)                                                                                                           |                                                |
| DCL569  | <i>mkcSi13 [sun-1p::rde-1::sun-1 3' UTR + unc-119(+)] II; rde-1(ne219) V</i>                                                                                     | Germline specific RNAi                         |
| NIS1700 | <i>kyEx1700[myo-2p::mCherry + U6p::sgRNA(empty) + eft-3p::Cas9 + dpy-30p::wGxxFP(empty)]</i>                                                                     | N2 mock #1                                     |
| NIS1701 | <i>kyEx1701[myo-2p::mCherry + U6p::gfp sgRNA + eft-3p::Cas9 + dpy-30p::wGxxFP(empty)]</i>                                                                        | N2 mock #2                                     |
| NIS1702 | <i>kyEx1702[myo-2p::mCherry + U6p::daf-2 sgRNA + dpy-5p::Cas9 + dpy-30p::wGxxFP(daf-2)]</i>                                                                      | hypodermis specific KO                         |
| NIS1703 | <i>kyEx1703[myo-2p::mCherry + U6p::daf-2 sgRNA + unc-54p::Cas9 + dpy-30p::wGxxFP(daf-2)]</i>                                                                     | muscle specific KO                             |
| NIS1704 | <i>kyEx1704[myo-2p::mCherry + U6p::daf-2 sgRNA + rgef-1p::Cas9 + dpy-30p::wGxxFP(daf-2)]</i>                                                                     | neuron specific KO                             |
| NIS1705 | <i>kyEx1705[myo-2p::mCherry + U6p::daf-2 sgRNA + gly-19p::Cas9 + dpy-30p::wGxxFP(daf-2)]</i>                                                                     | intestine specific KO                          |
| NIS1706 | <i>kyEx1706[myo-2p::mCherry + U6p::daf-2 sgRNA + unc-54p::Cas9 + dpy-30p::wGxxFP(daf-2)]</i>                                                                     |                                                |
| NIS1707 | <i>kyEx1707[myo-2p::mCherry + U6p::daf-2 sgRNA + ehn-3p::Cas9 + dpy-30p::wGxxFP(daf-2)]</i>                                                                      |                                                |
| NIS1708 | <i>unc-31(e298) V</i> (outcrossed 3x); <i>kyEx1704[myo-2p::mCherry + U6p::daf-2 sgRNA + rgef-1p::Cas9 + dpy-30p::wGxxFP(daf-2)]</i>                              |                                                |
| NIS1709 | <i>unc-31(e298) V</i> (outcrossed 3x); <i>kyEx1705[myo-2p::mCherry + U6p::daf-2 sgRNA + gly-19p::Cas9 + dpy-30p::wGxxFP(daf-2)]</i>                              |                                                |
| NIS1710 | <i>huls33[sod-3::gfp + rol-6(su1006)]; kyEx1704[myo-2p::mCherry + U6p::daf-2 sgRNA + rgef-1p::Cas9]</i>                                                          |                                                |
| NIS1711 | <i>huls33[sod-3::gfp + rol-6(su1006)]; kyEx1705[myo-2p::mCherry + U6p::daf-2 sgRNA + gly-19p::Cas9]</i>                                                          |                                                |
| NIS1712 | <i>huls33[sod-3::gfp + rol-6(su1006)]; kyEx1702[myo-2p::mCherry + U6p::daf-2 sgRNA + dpy-5p::Cas9]</i>                                                           |                                                |
| NIS1713 | <i>zIs356[daf-16::gfp + rol-6(su1006)]; kyEx1704[myo-2p::mCherry + U6p::daf-2 sgRNA + rgef-1p::Cas9]</i>                                                         |                                                |
| NIS1714 | <i>zIs356[daf-16::gfp + rol-6(su1006)]; kyEx1705[myo-2p::mCherry + U6p::daf-2 sgRNA + gly-19p::Cas9]</i>                                                         |                                                |
| NIS1715 | <i>huls33[sod-3::gfp + rol-6(su1006)]; kyEx1708[myo-2p::mCherry + eft-3p::Cas9]</i>                                                                              | sod-3::gfp mock                                |
| NIS1716 | <i>rde-1(ne219) V</i> (outcrossed 3x); <i>kbIs7[nhx-2p::rde-1; rol-6(su1006)]; kyEx1705[myo-2p::mCherry + U6p::daf-2 sgRNA + rgef-1p::Cas9]</i>                  | neuron specific KO and intestine specific RNAi |
| NIS1717 | <i>sid-1(pk3321) V</i> (outcrossed 0x); <i>uls69[myo-2p::mCherry + unc-119p::sid-1]; kyEx1706[myo-3p::mCherry + U6p::daf-2 sgRNA + gly-19p::Cas9]</i>            | intestine specific KO and neuron specific RNAi |
| NIS1718 | <i>huls33[sod-3::gfp + rol-6(su1006)]; kyIs1705[myo-2p::mCherry + U6p::daf-2 sgRNA + rgef-1p::Cas9]</i> (outcrossed 0x) #1                                       |                                                |
| NIS1719 | <i>huls33[sod-3::gfp + rol-6(su1006)]; kyIs1705[myo-2p::mCherry + U6p::daf-2 sgRNA + rgef-1p::Cas9]</i> (outcrossed 0x) #2                                       |                                                |
| NIS1720 | <i>huls33[sod-3::gfp + rol-6(su1006)]; kyIs1706[myo-2p::mCherry + U6p::daf-2 sgRNA + gly-19p::Cas9]</i> (outcrossed 0x) #1                                       |                                                |
| NIS1721 | <i>huls33[sod-3::gfp + rol-6(su1006)]; kyIs1706[myo-2p::mCherry + U6p::daf-2 sgRNA + gly-19p::Cas9]</i> (outcrossed 0x) #2                                       |                                                |
| NIS1722 | <i>huls33[sod-3::gfp + rol-6(su1006)]; kyIs1706[myo-2p::mCherry + U6p::daf-2 sgRNA + gly-19p::Cas9]</i> (outcrossed 0x) #3                                       |                                                |
| NIS1723 | <i>zIs356[daf-16::gfp + rol-6+C22:C40(su1006)]; kyIs1705[myo-2p::mCherry + U6p::daf-2 sgRNA + rgef-1p::Cas9]</i> (outcrossed 0x)                                 |                                                |
| NIS1724 | <i>sid-1(qt9) V</i> (outcrossed x1); <i>huls33[sod-3::gfp + rol-6(su1006)]; kyIs1705[myo-2p::mCherry + U6p::daf-2 sgRNA + rgef-1p::Cas9]</i> (outcrossed 2x)     |                                                |
| NIS1725 | <i>unc-31(e298) IV</i> (outcrossed 5x)                                                                                                                           |                                                |
| NIS1726 | <i>unc-31(e298) IV</i> (outcrossed 6x); <i>huls33[sod-3::gfp + rol-6(su1006)]</i>                                                                                |                                                |
| NIS1727 | <i>unc-31(e298) IV</i> (outcrossed 6x); <i>huls33[sod-3::gfp + rol-6(su1006)]; kyIs1705[myo-2p::mCherry + U6p::daf-2 sgRNA + rgef-1p::Cas9]</i> (outcrossed 2x)  |                                                |
| NIS1728 | <i>unc-64(e246) III</i> (outcrossed 1x); <i>huls33[sod-3::gfp + rol-6(su1006)]</i>                                                                               |                                                |
| NIS1729 | <i>unc-64(e246) III</i> (outcrossed 1x); <i>huls33[sod-3::gfp + rol-6(su1006)]; kyIs1705[myo-2p::mCherry + U6p::daf-2 sgRNA + rgef-1p::Cas9]</i> (outcrossed 2x) |                                                |
| NIS1730 | <i>unc-64(e246) III</i> (outcrossed 1x); <i>huls33[sod-3::gfp + rol-6(su1006)]; kyIs1706[myo-2p::mCherry + U6p::daf-2 sgRNA + gly-19p::Cas9]</i> (outcrossed 2x) |                                                |

**Table S15. Primer List. Related to STAR Method**

| <b>Primer</b>              | <b>Sequence</b>                                 |
|----------------------------|-------------------------------------------------|
| <i>daf-2</i> RNAi Fw       | 5'-ATCCCTCCGATCAATGCGAC-3'                      |
| <i>daf-2</i> RNAi Rv       | 5'-TGCTGTTGGAGAGCTGCTGC-3'                      |
| <i>daf-16</i> RNAi Fw      | 5'-AGAATGAAGGAGCGGAAAG-3'                       |
| <i>daf-16</i> RNAi Rv      | 5'-ACTGTTCAACTCGTGGTATG-3'                      |
| pDD162_non-sgRNA Fw        | 5'-AAGTGGCACCGAGTCGGTGCACACCTTAAAGGCGCA-3'      |
| pDD162_non-sgRNA Rv        | 5'-GCACCGACTCGGTGCCTGCGCCTTTAAGGTGTACAG-3'      |
| empty sgRNA Fw             | 5'-GGGAGACCGGCAGATACTTTATTGTGCCGCAAGA-3'        |
| empty sgRNA Rv             | 5'-TATCGATAAGCTTGAAGTGCACCATATGCGGTGTG-3'       |
| <i>daf-2</i> sg RNA Fw     | 5'-CGGACAACAGTGTGGAGGTTTTAGAGCTAGAAATAGC-3'     |
| <i>daf-2</i> sg RNA Rv     | 5'-CACACTGTTGTCCGAGCCAAGAACATCTCGCAATAGGA-3'    |
| <i>Prgef-1</i> Fw          | 5'-ATGATTACGCCAAGCGATAAACCCTTTGGATGAGC-3'       |
| <i>Prgef-1</i> Rv          | 5'-GTATTTTTTGTCCATCGTCGTCGTCGTCGATGCCG-3'       |
| <i>Pgly-19</i> Fw          | 5'-ATGATTACGCCAAGCCAAATATTCTCATTTCAAAA-3'       |
| <i>Pgly-19</i> Rv          | 5'-GTATTTTTTGTCCATCTGGAAATTTAAATTTAATT-3'       |
| <i>Pdpy-5</i> Fw           | 5'-CATGATTACGCCAAGCCATAGAAGTATGGGCCAAAA-3'      |
| <i>Pdpy-5</i> Rv           | 5'-GTATTTTTTGTCCATTTTCTGAAAACACAGAGACT-3'       |
| <i>Pehn-3</i> Fw           | 5'-ATGATTACGCCAAGCTAATCTAGAAAAATACGACA-3'       |
| <i>Pehn-3</i> Rv           | 5'-GTATTTTTTGTCCATTTTGTAAATTTGGAAGCTGGG-3'      |
| wGxxFP insert Fw           | 5'-CCGCTGCAGTCGACAGATCTTGCACTACTGGAAAACCTACC-3' |
| wGxxFP insert Rv           | 5'-CAATTGGAGTATTTTGTGTTGA-3'                    |
| wGxxFP vector Fw           | 5'-AAAATACTCCAATTGGCGAT-3'                      |
| wGxxFP vector Rv           | 5'-TGTCGACTGCAGCGGCCGCGTTGATAATGGTCTGCTAGT-3'   |
| wGxxFP ( <i>daf-2</i> ) Fw | 5'-ATTATCAACGCGGCCATGACGCCAGGCTTCTTCAC-3'       |
| wGxxFP ( <i>daf-2</i> ) Rv | 5'-CAGTAGTGCAAGATCGAGATAGTCACGGAGATTTTC-3'      |
